# Supplementary material for: Genome-Wide Association Analysis for Candidate Genes Contributing to Kernel-Related Traits in Maize
Source: Front Plant Sci. 2022 May 24;13:872292. doi: 10.3389/fpls.2022.872292 (PMC9171146; doi:10.3389/fpls.2022.872292)
Supplement: Supplementary file 2 [file Table_2.XLS]

## Sheet: TableS1
Table S1. Summary of phenotype for kernel related traits at seven environments and BLUP.
Trait	Env.a	Range	Mean±SDb	Skewness	Kurtosis	CVc (%)	Heritability (%)
KL(㎜)	19YL	10.15-13.31	11.71±0.78	-0.151	-0.714	6.66	84.93
	19UR	9.28-13.33	11.02±0.90	-0.004	-0.543	8.21
	19NX	8.74-13.99	11.60±0.91	-0.197	0.473	7.85
	19BLUP	9.81-13.07	11.44±0.64	-0.13	-0.22	5.62
	20NX	9.34-13.22	11.41±0.0.86	-0.08	-0.41	7.53	63.9
	20UR	8.81-12.71	10.87±0.76	0.58	-0.22	6.98
	20ZY	9.13-12.56	11.09±0.73	-0.2	-0.52	6.56
	20TY	8.63-12.32	10.57±0.73	-0.15	-0.38	6.93
	20BLUP	10.08-11.82	10.99±0.34	-0.1	-0.24	3.11
KW(㎜)	19YL	7.12-10.03	8.59±0.64	0.175	-0.429	7.46	90.96
	19UR	6.87-9.99	8.32±0.61	0.175	-0.276	7.36
	19NX	6.77-10.07	8.49±0.59	0.293	0.223	7
	19BLUP	7.06-9.78	8.46±0.51	0.21	-0.15	6.05
	20NX	6.41-10.06	8.16±0.68	0.08	0.01	8.27	69.63
	20UR	6.73-9.62	8.23±0.60	-0.05	-0.23	7.27
	20ZY	6.52-9.76	8.19±0.65	-0.06	-0.3	7.99
	20TY	6.77-10.11	8.45±0.69	0.03	-0.2	8.15
	20BLUP	7.35-9.02	8.26±0.33	0.01	-0.28	3.99
KT(㎜)	19YL	4.00-5.87	4.71±0.38	0.53	0.162	8.07	85.38
	19UR	3.70-5.88	4.69±0.41	0.188	0.262	8.7
	19NX	3.82-6.24	4.62±0.38	0.902	2.286	8.19
	19BLUP	4.06-5.48	4.67±0.29	0.31	0.07	6.24
KT(㎜）	20NX	3.73-5.64	4.67±0.40	0.07	-0.28	8.5	65.78
	20UR	3.75-5.71	4.82±0.37	-0.25	-0.31	7.58
	20ZY	3.24-5.70	4.56±0.41	0.24	0.18	9.01
	20TY	3.43-5.78	4.54±0.45	-0.1	0.13	9.84
	20BLUP	4.16-5.21	4.65±0.19	0.06	0.21	4.03
HKW(g)	19YL	19.08-43.92	30.02±4.40	0.272	0.024	14.66	87.54
	19UR	18.52-45.73	30.58±5.23	0.193	0.125	17.09
	19NX	23.37-48.72	34.09±4.67	0.285	-0.204	13.7
	19BLUP	23.81-44.27	31.56±3.73	0.31	0.12	11.83
HKW(g）	20NX	18.16-42.99	30.31±5.10	-0.02	-0.56	16.83	86.38
	20UR	15.09-40.30	27.99±5.14	-0.04	-0.6	18.37
	20ZY	19.52-36.51	28.01±4.08	-0.14	-0.7	14.56
	20TY	16.52-37.36	27.34±5.11	-0.11	-0.6	18.68
	20BLUP	20.28-38.09	28.44±3.57	-0.07	-0.6	12.54
KL is kernel length, KW is kernel width, KT is kernel thickness, HKW is hundred-kernel weight.
a Env., the specific environment: YL is Yulin; WLMQ is Wulumuqi; NX is Ningxia; ZY is Zhangye; TY is Taiyuan; BLUP is Best Linear Unbiased Prediction.
b SD, standard deviation
c CV, coefficient of variation
