# Supplementary material for: Genome-Wide Association Analysis for Candidate Genes Contributing to Kernel-Related Traits in Maize
Source: Front Plant Sci. 2022 May 24;13:872292. doi: 10.3389/fpls.2022.872292 (PMC9171146; doi:10.3389/fpls.2022.872292)
Supplement: Supplementary file 3 [file Table_3.XLS]

## Sheet: Table S2
Table S2. Number of all significant loci identified in the study.
Numa	SNP	Position (bp)	Chrb	Trait	Genotype	P.value	PVEc	Env.d	Model	Year
1	Affx-291406950	8974336	1	KW	A/G	4.90013e-05	0.06904	20TY	FarmCPU	2020
2	Affx-291390845	10982901	1	HKW	T/C	4.32294e-05	0.2045	19BLUP	FarmCPU	2019
				HKW	T/C	5.76497e-05	0.1484	20BLUP	FarmCPU	2020
3	Affx-291390740	10996069	1	HKW	C/T	7.8562e-05	0.08847	19YL	FarmCPU	2019
4	Affx-291384901	14919775	1	KW	G/A	1.54262e-08	0.05136	20ZY	FarmCPU	2020
5	Affx-291383773	19400024	1	KT	T/C	5.51726e-05	0.08093	20UR	FarmCPU	2020
6	Affx-291395951	19526032	1	KW	C/T	9.86594e-05	0.01841	20ZY	FarmCPU	2020
7	Affx-291399853	22065925	1	KT	T/G	2.40456e-06	0.1002	20BLUP	FarmCPU	2020
8	Affx-291398371	26675282	1	KW	T/C	6.5653e-05	0.01479	19UR	MLM	2019
9	Affx-291381235	26685474	1	KW	G/A	5.93821e-05	0.02551	20NX	FarmCPU	2020
10	Affx-291403197	27080458	1	KW	C/T	1.60642e-05	0.0001616	20ZY	FarmCPU	2020
11	Affx-291429145	27377500	1	KW	G/A	5.45823e-05	0.03174	20BLUP	FarmCPU	2020
12	Affx-291380474	27400644	1	KW	A/G	7.29106e-05	0.028	20NX	FarmCPU	2020
13	Affx-291436880	27905121	1	KW	T/C	5.26823e-05	0.00257	20ZY	FarmCPU	2020
14	Affx-291390256	33464034	1	KL	C/G	2.85173e-05	0.1092	20UR	FarmCPU	2020
15	Affx-291393807	39251690	1	KT	A/C	7.18344e-05	0.1226	20ZY	FarmCPU	2020
16	Affx-291444813	74783422	1	KW	G/A	8.5816e-05	0.08878	20UR	FarmCPU	2020
17	Affx-291422214	76740315	1	KW	T/C	1.71169e-05	0.09262	20BLUP	FarmCPU	2020
18	Affx-291383557	78544582	1	HKW	C/T	6.04566e-05	0.1033	20BLUP	FarmCPU	2020
				HKW	C/T	2.12991e-05	0.09096	20ZY	FarmCPU	2020
				KW	C/T	4.75523e-05	0.08349	20UR	FarmCPU	2020
19	Affx-291423300	100912055	1	KW	C/A	1.3764e-05	0.01861	20ZY	FarmCPU	2020
20	Affx-291405376	174393364	1	HKW	G/C	2.41192e-05	0.07705	19YL	FarmCPU	2019
21	Affx-291391270	179399304	1	KT	C/A	5.93771e-05	0.02644	19UR	FarmCPU	2019
22	Affx-159139267	181897769	1	KW	T/C	8.34651e-05	0.08422	19UR	FarmCPU	2019
23	Affx-291443459	190584813	1	KW	A/G	4.92497e-05	0.04881	20ZY	FarmCPU	2020
24	Affx-159101664	191481112	1	KW	C/T	1.2262e-05	0.0158	20ZY	FarmCPU	2020
25	Affx-88978221	194525507	1	KT	C/A	7.54067e-05	0.09123	19YL	FarmCPU	2019
				HKW	C/A	9.12915e-05	0.07015	19YL	FarmCPU	2019
26	Affx-159130753	214938582	1	KT	G/A	4.51305e-05	0.0234	20BLUP	FarmCPU	2020
27	Affx-291399275	217085450	1	HKW	A/G	1.61224e-06	0.08958	20ZY	FarmCPU	2020
28	Affx-158967644	223898746	1	HKW	A/C	7.05159e-05	0.09643	20TY	FarmCPU	2020
29	Affx-158997616	225557725	1	KT	A/G	1.85615e-05	0.0269	20BLUP	FarmCPU	2020
30	Affx-291380964	264589214	1	KL	G/A	2.88011e-05	0.1822	19UR	FarmCPU	2019
31	Affx-291444733	269146840	1	KT	T/G	2.62224e-05	0.06051	19BLUP	FarmCPU	2019
				KT	T/G	2.86035e-05	0.08415	19YL	FarmCPU	2019
32	Affx-291398122	269147398	1	KT	A/G	1.26231e-05	0.04579	19YL	FarmCPU	2019
33	Affx-291385743	272419839	1	KT	T/G	8.31451e-05	0.06531	19YL	FarmCPU	2019
34	Affx-291408242	276877463	1	KT	A/C	5.8984e-06	0.09486	20BLUP	FarmCPU	2020
35	Affx-291436382	278088989	1	KW	T/C	3.58022e-06	0.000437	20ZY	FarmCPU	2020
36	Affx-291429651	5464691	2	KT	A/G	1.1125e-05	0.1335	20ZY	FarmCPU	2020
				KT	A/G	2.2734e-05	0.1335	20ZY	MLM	2020
37	Affx-113090994	5504295	2	KL	G/A	1.07998e-05	0.1333	20UR	FarmCPU	2020
38	Affx-291441486	9113733	2	KT	G/A	3.7073e-05	0.03512	20UR	MLM	2020
39	Affx-291436773	17561028	2	KL	A/G	4.97e-05	0.06255	19BLUP	FarmCPU	2019
40	Affx-291426557	20723086	2	KL	A/C	9.46024e-05	0.09204	19YL	FarmCPU	2019
41	Affx-291390860	27339822	2	KT	A/G	1.4719e-05	0.04181	20NX	MLM	2020
42	Affx-291399559	86976444	2	KW	A/T	5.71665e-05	0.01477	20UR	FarmCPU	2020
43	Affx-291378308	87411459	2	KW	G/A	6.54668e-05	0.01345	20UR	FarmCPU	2020
44	Affx-291406264	87482064	2	KW	A/G	8.78422e-05	0.01371	20UR	FarmCPU	2020
45	Affx-291442906	90153415	2	KL	C/T	1.80981e-07	0.1552	19UR	FarmCPU	2019
46	Affx-291390829	114620946	2	HKW	C/G	7.0833e-05	0.2445	19UR	FarmCPU	2019
47	Affx-291391554	137144692	2	HKW	A/G	9.91502e-05	0.07706	20UR	FarmCPU	2020
				HKW	A/G	2.29694e-08	0.06303	20ZY	FarmCPU	2020
				KW	A/G	6.28908e-05	0.01325	20UR	FarmCPU	2020
48	Affx-291434075	146544845	2	KL	A/G	1.43862e-08	0.1512	19UR	FarmCPU	2019
49	Affx-291377652	160332591	2	KW	T/C	5.02406e-05	0.07701	19YL	FarmCPU	2019
50	Affx-291400833	178633291	2	KT	C/A	9.91199e-05	0.0685	20NX	FarmCPU	2020
51	Affx-291375641	181477160	2	HKW	G/A	2.69784e-05	0.01608	20NX	FarmCPU	2020
				HKW	G/A	7.9631e-05	0.01608	20NX	MLM	2020
52	Affx-158973407	208045847	2	HKW	G/A	4.40997e-05	0.02448	20UR	FarmCPU	2020
53	Affx-158866542	230348492	2	HKW	T/G	6.36638e-05	0.01368	20NX	FarmCPU	2020
54	Affx-158854316	231611700	2	KW	G/A	1.42137e-05	0.275	19BLUP	FarmCPU	2019
				KW	G/A	2.5762e-05	0.2606	19YL	FarmCPU	2019
				HKW	G/A	6.82762e-05	0.101	19BLUP	FarmCPU	2019
				HKW	G/A	2.6568e-05	0.1066	19NX	FarmCPU	2019
				KT	G/A	8.8637e-05	0.1511	19YL	FarmCPU	2019
				KW	G/A	1.9874e-11	0.1396	20ZY	FarmCPU	2020
55	Affx-291401517	235207368	2	KW	G/A	1.58635e-05	0.1036	20NX	FarmCPU	2020
56	Affx-291401689	25153684	3	KT	A/C	6.0214e-05	0.001424	20NX	MLM	2020
57	Affx-291397689	55160648	3	KT	A/G	5.2731e-05	0.001851	20NX	MLM	2020
58	Affx-291408284	119347811	3	KW	A/C	9.58232e-05	0.007915	20ZY	FarmCPU	2020
59	Affx-291399211	126647700	3	KT	G/A	1.9371e-05	0.06338	20NX	MLM	2020
60	Affx-291392198	136880948	3	KT	T/C	5.1469e-05	0.02249	20NX	MLM	2020
61	Affx-88984036	141646415	3	KT	A/G	3.7049e-05	0.0003836	20NX	MLM	2020
62	Affx-291398282	145210669	3	KT	T/G	9.46609e-05	0.05068	20TY	FarmCPU	2020
63	Affx-291375815	159421858	3	KL	A/G	9.96574e-05	0.03437	19UR	FarmCPU	2019
64	Affx-291394407	167412990	3	KT	T/C	3.94336e-05	0.09072	20NX	FarmCPU	2020
65	Affx-158958794	179564341	3	KL	G/A	9.58996e-05	0.02153	19BLUP	FarmCPU	2019
				KL	G/A	8.00688e-05	0.02303	19YL	FarmCPU	2019
66	Affx-291417593	195177356	3	KW	T/C	9.78471e-07	0.09142	20ZY	FarmCPU	2020
67	Affx-291382971	222515096	3	KL	G/A	7.08161e-05	0.004938	20UR	FarmCPU	2020
68	Affx-291381677	229506045	3	HKW	C/A	6.35999e-08	0.08767	20ZY	FarmCPU	2020
69	Affx-291444493	1490460	4	KL	T/G	9.67361e-13	0.1772	19UR	FarmCPU	2019
70	Affx-291391273	17322791	4	KW	T/C	7.9325e-05	0.02993	20UR	MLM	2020
71	Affx-291424043	65545670	4	KW	T/C	9.7163e-05	0.06043	20NX	FarmCPU	2020
72	Affx-291427414	143111191	4	KW	C/T	1.66209e-05	0.06765	20NX	FarmCPU	2020
73	Affx-291429329	147814120	4	HKW	C/T	9.96446e-05	0.01656	20UR	FarmCPU	2020
74	Affx-291432871	172794299	4	KT	G/T	5.58331e-05	0.01891	20BLUP	FarmCPU	2020
75	Affx-291384181	195727977	4	KL	C/A	8.1338e-05	0.1647	19BLUP	MLM	2019
				KL	C/A	2.8627e-05	0.1569	19NX	MLM	2019
				KL	C/A	4.86309e-06	0.1569	19NX	FarmCPU	2019
76	Affx-291427681	216102652	4	KL	G/A	3.57363e-05	0.1851	19BLUP	FarmCPU	2019
				KL	G/A	1.77175e-05	0.1822	19UR	FarmCPU	2019
77	Affx-291436550	216263729	4	KL	T/C	9.34e-05	0.2255	19BLUP	FarmCPU	2019
78	Affx-291402473	220532189	4	KT	A/G	8.46033e-05	0.08331	19BLUP	FarmCPU	2019
79	Affx-291429931	224307693	4	HKW	C/A	2.0637e-05	0.07742	19BLUP	MLM	2019
				HKW	C/A	4.1375e-05	0.09013	19UR	MLM	2019
				HKW	C/A	8.2273e-05	0.07208	19YL	MLM	2019
80	Affx-88987667	224366960	4	HKW	A/C	7.90412e-05	0.1292	20BLUP	FarmCPU	2020
				HKW	A/C	1.67891e-05	0.09596	20NX	FarmCPU	2020
81	Affx-291410507	224414845	4	HKW	T/C	2.02551e-05	0.1454	20BLUP	FarmCPU	2020
				HKW	T/C	1.27783e-05	0.09738	20NX	FarmCPU	2020
				HKW	T/C	4.35903e-08	0.1519	20ZY	FarmCPU	2020
82	Affx-159049531	225885794	4	HKW	G/A	2.4302e-05	0.1609	19YL	FarmCPU	2019
				HKW	G/A	3.1083e-05	0.1609	19YL	MLM	2019
83	Affx-92991828	228551905	4	KW	C/A	4.60317e-08	0.1054	20ZY	FarmCPU	2020
84	Affx-291390317	1730255	5	KL	C/G	7.73e-05	0.04108	19BLUP	FarmCPU	2019
85	Affx-291390758	58167459	5	HKW	T/G	3.61683e-05	0.1487	20TY	FarmCPU	2020
86	Affx-291378499	80495963	5	KL	C/T	4.57148e-05	0.1053	19YL	FarmCPU	2019
87	Affx-291436635	94258649	5	KL	C/A	3.96458e-06	0.001156	19NX	FarmCPU	2019
88	Affx-291435407	142512076	5	KW	T/C	1.86361e-05	0.06378	20NX	FarmCPU	2020
				KW	T/C	2.4499e-05	0.06378	20NX	MLM	2020
89	Affx-291433960	143992820	5	KT	G/A	9.6906e-05	0.01078	20NX	MLM	2020
90	Affx-291407446	160201314	5	KW	G/A	9.0089e-05	6.302e-05	20UR	MLM	2020
91	Affx-159080744	177680827	5	KL	G/T	4.69878e-05	0.02282	19NX	FarmCPU	2019
92	Affx-291402221	178786938	5	KL	T/G	7.2e-05	0.2359	19BLUP	FarmCPU	2019
93	Affx-291384574	182301254	5	KL	C/T	1.72834e-06	0.1171	19UR	FarmCPU	2019
94	Affx-93146171	189017621	5	KW	A/G	9.66842e-06	0.002707	20ZY	FarmCPU	2020
95	Affx-291395698	195501165	5	KT	C/T	8.4318e-05	0.05097	20UR	MLM	2020
96	Affx-291446052	206939893	5	HKW	A/G	6.46721e-06	0.009139	20ZY	FarmCPU	2020
97	Affx-291407617	210354335	5	KT	A/G	5.8842e-05	0.008472	20NX	MLM	2020
98	Affx-291397929	64103454	6	KL	C/T	3.93345e-12	0.08217	19NX	FarmCPU	2019
				KL	C/T	7.5517e-05	0.08217	19NX	MLM	2019
99	Affx-291417425	95765812	6	KL	T/G	4.52901e-05	0.0413	19NX	FarmCPU	2019
100	Affx-158832203	95772027	6	KW	T/C	4.93779e-06	0.01944	20ZY	FarmCPU	2020
101	Affx-291422408	110564977	6	KL	G/T	5.02503e-05	0.08284	20NX	FarmCPU	2020
102	Affx-158944562	121065833	6	HKW	C/T	9.13884e-05	0.007019	20UR	FarmCPU	2020
103	Affx-158835632	129696735	6	HKW	A/G	7.2797e-05	0.00245	20ZY	MLM	2020
104	Affx-291423841	129698471	6	HKW	T/C	1.62264e-08	0.006978	20ZY	FarmCPU	2020
105	Affx-291392933	150492145	6	KT	G/A	5.18586e-05	0.05222	19NX	FarmCPU	2019
106	Affx-291433471	18961125	7	KT	T/C	6.66122e-05	0.0193	20UR	FarmCPU	2020
107	Affx-291423982	20391977	7	KT	G/A	1.17519e-06	0.002464	20BLUP	FarmCPU	2020
108	Affx-291390838	112658725	7	KT	G/T	2.5462e-05	0.07684	20NX	MLM	2020
109	Affx-88993646	129756874	7	KW	A/G	9.86286e-05	0.1021	19BLUP	FarmCPU	2019
				KW	A/G	2.18616e-05	0.1153	19YL	FarmCPU	2019
110	Affx-291439711	139762033	7	KL	T/G	5.55751e-08	0.004826	19UR	FarmCPU	2019
111	Affx-291387156	153290572	7	KL	C/T	2.41941e-05	0.09674	20ZY	FarmCPU	2020
112	Affx-88994013	156549087	7	KL	C/A	4.5476e-05	0.09106	19NX	MLM	2019
113	Affx-291440710	159765889	7	HKW	G/A	3.83593e-05	0.1621	20BLUP	FarmCPU	2020
				HKW	G/A	1.56179e-07	0.1381	20ZY	FarmCPU	2020
				KL	G/A	8.09208e-05	0.08453	20ZY	FarmCPU	2020
114	Affx-291428872	159766537	7	HKW	C/T	6.78439e-05	0.1604	20BLUP	FarmCPU	2020
115	Affx-291399844	173124462	7	KT	C/T	3.70966e-05	0.06688	20NX	FarmCPU	2020
				KT	C/T	4.9132e-05	0.06688	20NX	MLM	2020
116	Affx-291384647	5912379	8	KL	A/G	9.45265e-06	0.00352	19NX	FarmCPU	2019
117	Affx-291401548	32884397	8	KW	C/T	9.9595e-05	0.01949	19UR	MLM	2019
118	Affx-291429945	139757849	8	KL	C/T	4.97324e-05	0.06432	20TY	FarmCPU	2020
119	Affx-291416457	139807192	8	KL	G/T	8.88672e-05	0.0602	20TY	FarmCPU	2020
120	Affx-291395050	146630509	8	HKW	A/G	8.185e-05	0.03589	20NX	MLM	2020
121	Affx-291383514	149720324	8	KT	C/T	3.8417e-05	0.05604	19NX	MLM	2019
122	Affx-113533161	149902067	8	KL	C/T	3.56555e-05	0.07021	20TY	FarmCPU	2020
123	Affx-291386039	150029908	8	HKW	C/T	7.00508e-05	0.04348	20ZY	FarmCPU	2020
124	Affx-291396188	157285390	8	KL	A/G	2.17172e-05	0.0001198	19NX	FarmCPU	2019
125	Affx-291374583	166333992	8	KW	A/G	7.85588e-05	0.1984	19YL	FarmCPU	2019
126	Affx-291427369	171344102	8	HKW	G/A	6.46843e-05	0.01504	19YL	FarmCPU	2019
127	Affx-291422735	6675061	9	KT	A/G	8.21497e-05	0.00245	20BLUP	FarmCPU	2020
128	Affx-158947732	13434358	9	KL	A/G	8.02837e-05	0.03148	20TY	FarmCPU	2020
129	Affx-291380024	20674256	9	KT	A/G	7.15027e-06	0.1033	20BLUP	FarmCPU	2020
130	Affx-291410539	75030590	9	HKW	C/T	5.30997e-05	0.003034	20ZY	FarmCPU	2020
131	Affx-291437566	115518026	9	KL	T/A	4.34791e-07	0.04126	19NX	FarmCPU	2019
132	Affx-291432501	131636925	9	KT	G/T	4.21247e-07	0.001191	20BLUP	FarmCPU	2020
133	Affx-291439689	143432847	9	KW	T/C	6.16112e-06	0.03057	19YL	FarmCPU	2019
134	Affx-291442472	144875791	9	KT	C/A	7.79371e-05	0.07428	20BLUP	FarmCPU	2020
135	Affx-291375197	151898762	9	KL	A/G	2.61801e-09	0.09183	19NX	FarmCPU	2019
136	Affx-291422705	154738430	9	HKW	G/A	1.96503e-06	2.675e-05	20ZY	FarmCPU	2020
137	Affx-291422096	85209820	10	KL	A/G	7.90106e-05	0.002234	19UR	FarmCPU	2019
138	Affx-291421924	142809084	10	HKW	G/A	2.01905e-05	0.002179	20ZY	FarmCPU	2020
139	Affx-291439959	145173023	10	HKW	A/C	9.0923e-05	0.02297	20TY	MLM	2020
a Num, number
b Chr, chromosome
c PVE, Phenotypic Variation Explained
a Env., the specific environment: YL is Yulin; WLMQ is Wulumuqi; NX is Ningxia; ZY is Zhangye; TY is Taiyuan; BLUP is Best Linear Unbiased Prediction.
