# Supplementary material for: Genome-Wide Association Analysis for Candidate Genes Contributing to Kernel-Related Traits in Maize
Source: Front Plant Sci. 2022 May 24;13:872292. doi: 10.3389/fpls.2022.872292 (PMC9171146; doi:10.3389/fpls.2022.872292)
Supplement: Supplementary file 4 [file Table_4.XLS]

## Sheet: Table S3
Table S3.List of candidate genes at the GWAS loci for grain moisture in maize.
Numa	SNP	Position	Chrb	Trait	Year	Candidate gene_V3	Gene_start	Gene_end	Annotation
1	Affx-291444733	269146840	1	KT	2019	GRMZM2G423423	269147449	269148335	zinc-finger homeodomain protein 11
	Affx-291398122	269147398	1	KT	2019	GRMZM2G423423	269147449	269148335	zinc-finger homeodomain protein 11
2	Affx-291398371	26675282	1	KW	2019	GRMZM2G541487	26698711	26698823	Unknown
	Affx-291381235	26685474	1	KW	2020	GRMZM2G541487	26698711	26698823	Unknown
3	Affx-291429145	27377500	1	KW	2020	GRMZM2G157580	27379754	27385134	uncharacterized protein LOC103632821
	Affx-291380474	27400644	1	KW	2020	GRMZM2G157580	27379754	27385134	uncharacterized protein LOC103632821
4	Affx-88978221	194525507	1	KT/HKW	2019	GRMZM2G546518	194527926	194528771	Unknown
5	Affx-291390845	10982901	1	HKW	2019/2020	GRMZM2G517502	10981295	10981375	Unknown
6	Affx-291383557	78544582	1	KW/HKW	2020	GRMZM5G815705	78563282	78565145	Unknown
7	Affx-291405376	174393364	1	HKW	2019	AC216888.3_FG002	174399331	174400117	Unknown
8	Affx-291390740	10996069	1	HKW	2019	GRMZM2G370985	11053446	11057141	uncharacterized protein LOC109943592
9	Affx-291380964	264589214	1	KL	2019	AC194164.3_FG004	264586157	264586786	Unknown
10	Affx-159139267	181897769	1	KW	2019	GRMZM2G086285	181910926	181913783	Unknown
11	Affx-291391270	179399304	1	KT	2019	GRMZM2G478599	179397346	179399333	aspartyl protease AED1
12	Affx-291385743	272419839	1	KT	2019	GRMZM2G178261	272415607	272419742	Growth-regulating factor 6
13	Affx-158967644	223898746	1	HKW	2020	GRMZM5G817794	223897349	223898927	Unknown
14	Affx-291399275	217085450	1	HKW	2020	GRMZM2G090542	217073963	217111687	aminopeptidase M1-B
15	Affx-291390256	33464034	1	KL	2020	GRMZM2G149647	33464178	33465385	heat shock protein26
16	Affx-291422214	76740315	1	KW	2020	GRMZM2G128955	76712960	76715167	Unknown
17	Affx-291406950	8974336	1	KW	2020	GRMZM2G046919	89402668	941804	pentatricopeptide repeat-containing protein At5g08305
18	Affx-291444813	74783422	1	KW	2020	GRMZM2G329194	74794614	74807720	Unknown
19	Affx-291384901	14919775	1	KW	2020	GRMZM2G440280	14957965	14958681	Unknown
20	Affx-291436382	278088989	1	KW	2020	GRMZM2G031138	278088968	278093752	UDP-glycosyltransferase 83A1-like
21	Affx-159101664	191481112	1	KW	2020	GRMZM2G074114	191480086	191483144	Pyridoxamine 5'-phosphate oxidase family protein
22	Affx-291423300	100912055	1	KW	2020	GRMZM5G875327	100915707	100915907	Unknown
23	Affx-291403197	27080458	1	KW	2020	GRMZM2G462777	27079246	27080322	Unknown
24	Affx-291443459	190584813	1	KW	2020	GRMZM2G169820	190580078	190595543	auxin response factor 21
25	Affx-291436880	27905121	1	KW	2020	GRMZM2G040561	27895468	27916476	Chaperone protein dnaJ A7A, chloroplastic
26	Affx-291395951	19526032	1	KW	2020	GRMZM2G398639	19526116	19526676	Unknown
27	Affx-291399853	22065925	1	KT	2020	GRMZM2G346750	22068008	22069377	transcription factor bHLH84
28	Affx-291408242	276877463	1	KT	2020	GRMZM2G120484	276875829	276877406	Unknown
29	Affx-158997616	225557725	1	KT	2020	GRMZM2G056431	225559003	225561307	uncharacterized protein LOC100276276
30	Affx-159130753	214938582	1	KT	2020	AC203090.3_FG001	214975988	214977342	Unknown
31	Affx-291383773	19400024	1	KT	2020	GRMZM2G420357	19474650	19475814	leucine-rich repeat extensin-like protein 3
32	Affx-291393807	39251690	1	KT	2020	GRMZM2G061202	39247776	39253303	putative DUF604-domain containing/glycosyltransferase-related family protein
33	Affx-158854316	231611700	2	KW/HKW/KT	2019/2020	GRMZM2G372180	231598423	231605113	kinesin-like protein KIN-14P
34	Affx-291391554	137144692	2	KW/HKW	2020	GRMZM2G052193	137144612	137145424	uncharacterized protein LOC100502476
35	Affx-291429651	5464691	2	KT	2020	GRMZM2G400961	5465397	5467995	DNA topoisomerase 2
36	Affx-291375641	181477160	2	HKW	2020	GRMZM2G359521	181475706	181477399	uncharacterized protein
37	Affx-291390829	114620946	2	HKW	2019	GRMZM2G395061	114603688	114605457	protein trichome birefringence-like 13
38	Affx-291436773	17561028	2	KL	2019	GRMZM2G339691	17560867	17561073	Unknown
39	Affx-291434075	146544845	2	KL	2019	GRMZM2G045509	146581029	14658125	Unknown
40	Affx-291442906	90153415	2	KL	2019	AC211976.4_FG002	90205811	90208636	Unknown
41	Affx-291426557	20723086	2	KL	2019	GRMZM5G809584	20726626	20727258	Unknown
42	Affx-291377652	160332591	2	KW	2019	GRMZM2G535474	160323691	160323863	Unknown
43	Affx-158866542	230348492	2	HKW	2020	GRMZM2G483797	230350966	230351095	Unknown
44	Affx-158973407	208045847	2	HKW	2020	GRMZM2G022213	208042001	208045546	uncharacterized protein LOC100383144
45	Affx-113090994	5504295	2	KL	2020	GRMZM2G474033	55042805	507668	Unknown
46	Affx-291401517	235207368	2	KW	2020	GRMZM2G423636	235203003	235207925	uncharacterized protein LOC100276934
47	Affx-291399559	86976444	2	KW	2020	GRMZM2G027307	86977315	86991334	palmitoyltransferase ZDHHC20
48	Affx-291378308	87411459	2	KW	2020	GRMZM2G028313	87396518	87420076	eukaryotic peptide chain release factor GTP-binding subunit ERF3A
49	Affx-291406264	87482064	2	KW	2020	GRMZM2G498535	87522528	87522688	Unknown
50	Affx-291400833	178633291	2	KT	2020	GRMZM2G527886	178629993	178630107	Unknown
51	Affx-291390860	27339822	2	KT	2020	GRMZM2G114149	27338617	27340322	Unknown
52	Affx-291441486	9113733	2	KT	2020	GRMZM2G084181	91183969	130485	ABC transporter C family member 2
53	Affx-158958794	179564341	3	KL	2019	GRMZM2G154641	179564866	179569662	BEL1-like homeodomain protein 9
54	Affx-291375815	159421858	3	KL	2019	GRMZM2G508734	159431220	159431342	Unknown
55	Affx-291381677	229506045	3	HKW	2020	GRMZM2G354579	229475962	229506517	uncharacterized protein LOC103651651
56	Affx-291382971	222515096	3	KL	2020	GRMZM2G327311	222507491	222538594	uncharacterized protein LOC103652610
57	Affx-291417593	195177356	3	KW	2020	GRMZM2G158807	195169400	19517209	protein NRT1/ PTR FAMILY 1.1
58	Affx-291408284	119347811	3	KW	2020	GRMZM5G807081	119341899	119343805	Unknown
59	Affx-291394407	167412990	3	KT	2020	GRMZM2G093119	167405942	167415294	Sister chromatid cohesion 1 protein 4
60	Affx-291398282	145210669	3	KT	2020	GRMZM2G122431	145209829	14521317	cellulose synthase-like protein G2
61	Affx-291399211	126647700	3	KT	2020	GRMZM2G124184	126543137	126549231	Unknown
62	Affx-88984036	141646415	3	KT	2020	GRMZM2G042125	141646543	141647359	Egg cell-secreted protein 1.4
63	Affx-291392198	136880948	3	KT	2020	GRMZM2G516203	136881249	136881339	Unknown
64	Affx-291397689	55160648	3	KT	2020	GRMZM2G396825	55169832	55172779	Unknown
65	Affx-291401689	25153684	3	KT	2020	GRMZM2G018918	25214839	25216143	Unknown
66	Affx-291427681	216102652	4	KL	2019	GRMZM2G523679	216104329	216104414	Unknown
67	Affx-291429931	224307693	4	HKW	2019	GRMZM2G132653	224304276	224313237	uncharacterized protein; cl2814_1(352)
68	Affx-291384181	195727977	4	KL	2019	GRMZM5G873295	195723850	195726874	uncharacterized protein
69	Affx-159049531	225885794	4	HKW	2019	GRMZM2G090381	225962619	225964150	cyclic nucleotide-gated ion channel 1
70	Affx-291410507	224414845	4	HKW	2020	GRMZM2G413193	224410980	224416043	WW domain-binding protein 11
71	Affx-88987667	224366960	4	HKW	2020	GRMZM2G175805	224366194	224367992	Late embryogenesis abundant (LEA) hydroxyproline-rich glycoprotein family
72	Affx-291436550	216263729	4	KL	2019	GRMZM5G896145	216232685	2162348	pentatricopeptide repeat-containing protein At1g66345, mitochondrial
73	Affx-291444493	1490460	4	KL	2019	GRMZM2G107239	14918761	495671	ARM repeat superfamily protein
74	Affx-291402473	220532189	4	KT	2019	GRMZM2G028182	220482468	220482887	Unknown
75	Affx-291429329	147814120	4	HKW	2020	GRMZM2G496770	147813432	147816122	MYB transcription factor；myb domain protein 19；putative MYB DNA-binding domain superfamily protein
76	Affx-291427414	143111191	4	KW	2020	GRMZM2G563925	143107471	143107593	Unknown
77	Affx-291424043	65545670	4	KW	2020	AC212745.3_FG001	65607000	65607623	Unknown
78	Affx-92991828	228551905	4	KW	2020	GRMZM2G092321	228550685	228552578	Unknown
79	Affx-291432871	172794299	4	KT	2020	GRMZM2G080642	172793978	17279481	Unknown
80	Affx-291391273	17322791	4	KW	2020	GRMZM2G104384	17311139	17323011	receptor protein kinase TMK1
81	Affx-291435407	142512076	5	KW	2020	GRMZM2G159759	142510282	142513269	GDSL esterase/lipase;pco114073(421)
82	Affx-291402221	178786938	5	KL	2019	GRMZM2G024693	178845637	178855018	Ras-related protein Rab-2-B-like
83	Affx-291390317	1730255	5	KL	2019	GRMZM2G497737	17304881	730592	Unknown
84	Affx-291436635	94258649	5	KL	2019	GRMZM2G517545	94261439	94261582	Unknown
85	Affx-159080744	177680827	5	KL	2019	GRMZM2G459166	177714945	177716366	F-box protein GID2
86	Affx-291384574	182301254	5	KL	2019	GRMZM2G137426	182136136	182142829	transcription factor bHLH128
87	Affx-291378499	80495963	5	KL	2019	GRMZM5G853923	80489447	80515224	Unknown
88	Affx-291390758	58167459	5	HKW	2020	GRMZM2G083472	58165088	58167724	Unknown
89	Affx-291446052	206939893	5	HKW	2020	GRMZM2G105644	206940311	206942851	Geranylgeranyl diphosphate reductase, chloroplastic
90	Affx-93146171	189017621	5	KW	2020	GRMZM2G040924	189017104	18901928	Transcription factor MYB17
91	Affx-291407446	160201314	5	KW	2020	GRMZM2G536295	160112469	160112582	Unknown
92	Affx-291407617	210354335	5	KT	2020	GRMZM2G113418	210348981	210350155	glutaredoxin 2
93	Affx-291433960	143992820	5	KT	2020	GRMZM2G577454	144007371	144008423	Unknown
94	Affx-291395698	195501165	5	KT	2020	GRMZM2G510510	195522267	195522796	Unknown
95	Affx-158835632	129696735	6	HKW	2020	GRMZM2G561786	129695762	129695859	Unknown
	Affx-291423841	129698471	6	HKW	2020	GRMZM2G561786	129695762	129695859	Unknown
96	Affx-291397929	64103454	6	KL	2019	GRMZM2G052812	64079621	64110792	IN2-2 protein；PCO148860；PCO148860a；aip1；aldo/keto reductase AKR1；auxin induced protein homolog1；auxin-induced protein PCNT115；csu190(gfu)；csuh190；pco148860(579)；putative oxidoreductase, aldo/keto reductase family protein
97	Affx-291417425	95765812	6	KL	2019	GRMZM2G170281	95765533	95768744	transmembrane 9 family protein member 4
98	Affx-291392933	150492145	6	KT	2019	GRMZM2G504530	150483436	150483689	Unknown
99	Affx-158944562	121065833	6	HKW	2020	GRMZM2G589017	121042530	121042649	Unknown
100	Affx-291422408	110564977	6	KL	2020	GRMZM2G156517	110559559	110562813	putative ubiquitin-conjugating enzyme family
101	Affx-158832203	95772027	6	KW	2020	GRMZM5G872479	95776831	95777082	Unknown
102	Affx-291440710	159765889	7	KL/HKW	2020	GRMZM2G100741	159765180	159767316	uncharacterized protein LOC100277857
	Affx-291428872	159766537	7	HKW	2020	GRMZM2G100741	159765180	159767316	uncharacterized protein LOC100277857
103	Affx-88993646	129756874	7	KW	2019	GRMZM2G096952	129753752	129758331	ABC transporter G family member 11; ABC transporter G family member 12
104	Affx-291399844	173124462	7	KT	2020	GRMZM5G814533	173124076	173124291	Unknown
105	Affx-291439711	139762033	7	KL	2019	GRMZM2G406315	139744383	139749298	nucleobase-ascorbate transporter 12-like
106	Affx-88994013	156549087	7	KL	2019	GRMZM2G008528	156548441	156550988	Unknown
107	Affx-291387156	153290572	7	KL	2020	GRMZM2G075794	153288576	153290674	uncharacterized LOC103633229
108	Affx-291423982	20391977	7	KT	2020	GRMZM2G431615	20394728	20396800	Unknown
109	Affx-291433471	18961125	7	KT	2020	GRMZM2G498026	18964559	18964686	Unknown
110	Affx-291390838	112658725	7	KT	2020	GRMZM2G071112	112658777	11266147	Mini zinc finger protein 3
111	Affx-291427369	171344102	8	HKW	2019	GRMZM2G440022	171332675	171333024	Unknown
112	Affx-291384647	5912379	8	KL	2019	GRMZM2G024674	59053535	906089	uncharacterized protein LOC103634704
113	Affx-291396188	157285390	8	KL	2019	GRMZM2G529466	157286305	157286379	Unknown
114	Affx-291374583	166333992	8	KW	2019	GRMZM5G826218	166336294	166337411	Unknown
115	Affx-291401548	32884397	8	KW	2019	GRMZM5G852876	33088147	33089570	Unknown
116	Affx-291383514	149720324	8	KT	2019	GRMZM5G846541	149779040	149779717	Unknown
117	Affx-291386039	150029908	8	HKW	2020	GRMZM2G363583	150047454	150054033	protein transport protein SEC31 homolog B
118	Affx-113533161	149902067	8	KL	2020	GRMZM2G417439	149935614	149937295	Unknown
119	Affx-291429945	139757849	8	KL	2020	AC200237.3_FG001	139757084	139757314	Unknown
120	Affx-291416457	139807192	8	KL	2020	AC200237.3_FG002	139765029	139765403	Unknown
121	Affx-291395050	146630509	8	HKW	2020	GRMZM2G171279	146628450	146633412	potassium channel 5
122	Affx-291375197	151898762	9	KL	2019	AC149810.2_FG008	151897573	151900165	putative protein kinase superfamily protein
123	Affx-291437566	115518026	9	KL	2019	GRMZM2G034110	115514419	115517835	Transcription factor MYBS3
124	Affx-291439689	143432847	9	KW	2019	GRMZM2G147775	143431683	143433935	actin-depolymerizing factor 5
125	Affx-291422705	154738430	9	HKW	2020	GRMZM2G092456	154737945	154738829	Unknown
126	Affx-291410539	75030590	9	HKW	2020	GRMZM2G377947	75013770	75014806	Unknown
127	Affx-158947732	13434358	9	KL	2020	GRMZM5G827463	13432567	13434151	Unknown
128	Affx-291432501	131636925	9	KT	2020	AC211706.4_FG003	131638894	1316391	Unknown
129	Affx-291380024	20674256	9	KT	2020	GRMZM2G570308	20678591	20678697	Unknown
130	Affx-291442472	144875791	9	KT	2020	GRMZM2G177878	144869094	144872515	putative inactive poly [ADP-ribose] polymerase SRO1
131	Affx-291422735	6675061	9	KT	2020	GRMZM2G051330	66712226	675883	Glucan 13-beta-glucosidase
132	Affx-291422096	85209820	10	KL	2019	GRMZM2G101836	85207958	85208533	Unknown
133	Affx-291421924	142809084	10	HKW	2020	GRMZM2G123008	142810059	142810638	Unknown
134	Affx-291439959	145173023	10	HKW	2020	GRMZM2G004924	145173827	145178977	CDT1-like protein a chloroplastic
a Num, number
b Chr, chromosome
