# Supplementary material for: Genome-Wide Association Analysis for Candidate Genes Contributing to Kernel-Related Traits in Maize
Source: Front Plant Sci. 2022 May 24;13:872292. doi: 10.3389/fpls.2022.872292 (PMC9171146; doi:10.3389/fpls.2022.872292)
Supplement: Supplementary file 5 [file Table_5.XLS]

## Sheet: Table S5
Table S5. Expression of candidate genes during kernel development of maize inbred lines B73.
gene_name	S0	S2	S3	S4	S6	S8	S10	S12	S14	S16	S18	S20	S22	S24	S26	S28	S30	S32	S34	S36	S38
GRMZM2G157580	36.87	27.02	25.06	25.02	18.5	13.69	11.94	8.44	7.37	12.37	12.08	14.1	14.58	9.64	11.98	9.05	9.89	17.37	11.07	14.74	13.69
GRMZM2G086285	15.36	11.51	9.56	13.04	13.14	8.22	10.07	7.72	7.75	8.52	9.81	8.35	16.1	6.66	11.41	11.38	12.03	20.57	21.48	21.25	17.96
GRMZM2G478599	0	0	0	0	0	0.04	0.21	0.68	0.5	0	0	0.04	0	0	0.07	0	0	0	0	0	0
GRMZM2G178261	30.83	16.18	19.38	14.98	12.23	7.41	4.6	4.66	4.89	5.33	5.71	8.04	3.39	4.63	7.33	9.4	22.93	29.19	22.46	19.13	25.24
GRMZM2G090542	30.68	41.08	38.7	48.29	42.2	32.59	22.73	13.97	13.03	19.86	15.01	18.32	20.83	14.18	18.05	19.63	24.99	28.03	24.79	27.43	18.57
GRMZM2G149647	0.2	0.06	0.1	0	0	0.27	0.4	0.19	0.71	0.11	2.95	0.58	0.38	2.42	1.61	0.92	6.74	1.5	2.78	3.57	3.17
GRMZM2G046919	0.63	1.01	0.7	0.48	0.52	0.73	1.05	0.38	0.18	0.57	0.46	0.51	0.1	0.51	0.3	0.17	0.73	0.58	1.02	0.84	0.61
GRMZM2G031138	1.3	1.15	0.85	1.38	1.37	2.4	2.88	2.73	1.66	1.43	1.18	1.49	1.12	0.98	0.88	1.13	4.61	2.23	3.94	2.15	6.87
GRMZM2G074114	23	29.58	20.24	19.09	20.95	19.3	10.91	9.3	6.25	10.44	7.42	7.49	5.87	8.03	8.29	9.23	13.44	15.5	16.03	12.3	12.36
GRMZM2G169820	55.27	46.64	54.67	60.56	60.98	32.63	14.12	9.55	9.4	12.44	10.82	11.87	12.59	13.94	15.71	29.97	56.03	94.4	65.51	84.86	92.05
GRMZM2G040561	9.54	10.32	9.87	14.14	15.57	14.89	14.68	15.91	7.83	8.73	8.86	7.9	7.36	5.34	7.37	6.25	10.12	11.98	16.33	11.67	13.04
GRMZM2G120484	22.29	12.01	13.93	30.84	31.78	22.96	19.4	31.78	10.17	10.41	9.93	9.25	17.86	6.93	11.33	7.46	16.38	10.24	24.04	8.91	15.22
GRMZM2G056431	24.85	87.32	125.61	228.4	379.8	191.75	101.59	52.15	60.57	76.17	80.21	61.3	138.84	76.91	86.59	113.65	19.59	7.69	14.57	38.48	8.6
GRMZM2G420357	0.25	0.35	0.58	0.28	0.5	0.4	0.03	0.21	0.13	0.21	0.17	0.48	0.32	0.31	0.12	0.23	1.04	1.11	1.16	0.68	1.31
GRMZM2G061202	8.52	3.66	2.97	4.9	3.94	2.11	0.95	0.89	0.69	0.64	0.88	0.91	0.63	0.6	1.32	1.05	3.12	3.95	4.16	2.53	4.96
GRMZM2G400961	0.23	0.02	0	0.03	0.05	0.1	0.03	0.08	0.07	0.03	0.1	0.03	0.49	0.17	0.12	0.15	0.24	0.08	0.58	0.07	0.22
GRMZM2G359521	2.27	2.35	2.83	2.34	5.28	3.87	0.55	1.24	0.94	0.95	0.39	0.9	0.06	0.22	0.37	0.23	1.62	0.55	1.14	0.11	0.58
GRMZM2G022213	3.55	4.89	4.87	5.31	5.14	3.38	4.41	3.75	3.59	2.9	3.42	4.62	2.14	2.66	2.74	3.24	4.92	4.92	4.88	3.96	8.45
GRMZM2G423636	4.88	6.42	4.53	5.89	4.9	5.58	3.82	2.42	1.77	2.67	2.4	3.06	2.6	2.73	3.25	3.74	7.25	11.67	11.15	12.57	15.84
GRMZM2G027307	38.93	46.57	51.59	53.4	48.06	34.94	17.25	16.71	12.78	16.24	16.34	17.03	18.95	13.1	15.39	20	24.28	29.08	26.91	28.44	23.38
GRMZM2G028313	49.42	47.49	42.27	47.76	47.27	83.04	78.91	42.94	36.27	67.13	46.9	49.41	51.7	37.29	48.2	42.02	45.95	60.82	48.52	52.28	37.37
GRMZM2G114149	0.46	0.62	0.75	0.79	0.51	0.56	0.88	0.62	0.33	0.39	0.56	0.74	0.65	0.99	1.02	1.03	1.94	1.15	1.72	1.87	1.05
GRMZM2G084181	33.07	35.79	34.6	33.7	32.36	22.02	12.29	8.59	6.78	12.33	10.55	12.07	13.23	8.73	14.46	20.98	32.54	46.82	43.78	45.92	37.83
GRMZM2G154641	14.01	8.38	10.45	10.79	6.98	4.01	1.17	1.66	0.76	0.77	0.64	1.01	0.76	0.84	0.58	0.68	1.81	2.14	1.1	1.87	2.43
GRMZM2G354579	0.02	0.99	3.21	9.37	31.44	81.85	39.99	53.38	14.31	9.24	4.38	4.85	8.66	14.44	18.91	4.2	0.87	0.53	0.31	2.75	0.24
GRMZM2G327311	21.84	16.1	18.46	17.73	13.9	11.41	11.89	9.99	8.02	11.22	9.41	11.09	12.26	9.87	11.78	15.58	14.86	24.56	22.9	29.99	24.07
GRMZM2G158807	4.59	7.25	8.58	14.58	46.01	30.5	16.26	15.95	15.95	15.5	15.54	14.8	9.05	13.44	15.46	10.49	12.11	7.15	10.35	10.41	6.14
GRMZM2G093119	43.52	36.33	38.49	34.46	32.29	21.8	17.95	13.84	12.27	16.08	15.06	15.31	14.84	13.24	16.54	15.91	22.9	28.33	19.09	28.93	22.46
GRMZM2G122431	0.27	0.19	0.37	0.24	0.05	0.02	0.12	0.39	0.15	0.28	0.52	1.22	0.9	0.71	0.87	1.08	5.71	1.95	4.53	2.1	4.95
GRMZM2G132653	21.94	18.29	18.24	18.68	17.63	13.69	10.45	7.17	6.06	9.08	8.33	8.45	6.66	5.66	6.97	7.2	9.33	15.49	10.01	16.18	11.15
GRMZM5G873295	29.67	29.48	24	22.18	24.98	23	19.9	14.04	11.66	19.54	14.7	14.22	20.93	11.84	15.08	13.39	13.91	14.41	12.71	15.89	12.17
GRMZM2G413193	36.71	25.18	38.38	29.18	29.27	36.48	34.17	25.4	21	23.37	27.64	24.92	14.13	18.14	19.98	15.06	23.43	27.84	33.13	22.2	20.07
GRMZM2G107239	9.78	8.3	7.18	6.78	8.25	13.42	14.72	5.43	4.54	14.19	10.31	11.12	12.96	8.94	9.38	7.05	5.19	7.37	4.3	9.07	6.17
GRMZM2G496770	0.86	0.68	1.95	1.15	1.71	1.34	1.26	1.57	0.85	1.49	0.96	0.89	0.14	0.62	2.19	0.96	2.33	2.2	1.88	0.17	1.03
GRMZM2G092321	26.65	22.75	25.68	25.72	34.79	29.79	21.59	19.46	14.65	21.52	16.99	19.37	17.46	15.95	22.15	20.68	22.67	32.58	27.2	33.08	25.34
GRMZM2G104384	3.05	3.03	2.75	3.53	1.75	1.43	1.01	0.86	0.81	1.46	1.37	1.64	1.44	1.32	1.89	2.72	1.74	1.88	1.73	1.81	1.69
GRMZM2G159759	25.23	24.58	24.77	18.91	31.15	26.23	12.77	17.99	12.05	18.34	19.37	17.16	21.12	16.82	23.22	22.69	20.88	22.57	12.74	18.15	15.62
GRMZM2G024693	39.87	57.68	49.56	55.13	52.65	49	25.77	20.08	21.67	24.89	19.77	19.88	26.11	17.91	23.29	27.18	33.38	35.81	34.57	34.82	32.45
GRMZM2G459166	1.32	2.09	1.32	1.35	1.49	1.35	0.88	0.66	0.53	0.8	0.27	0.52	0.3	0.56	0.62	0.52	0.75	1.05	1.1	0.98	0.95
GRMZM2G137426	0.17	0.17	0.06	0.06	0	0.03	0	0.02	0.01	0	0.04	0.01	0.33	0	0	0.03	0.03	0.07	0.02	0.03	0.03
GRMZM2G083472	33.9	36.44	36.11	35.02	34.54	21.87	7.37	6.27	4.93	7.26	5.16	5.08	7.28	3.26	2.92	5.54	9.83	11.87	7.16	8	7.02
GRMZM2G105644	7.9	3.07	2.26	1.29	2.06	1.04	1.57	5.67	4.55	6.24	4.57	8.11	4.05	4.28	2.54	2.78	3.01	1.4	3.66	2.57	5.66
GRMZM2G040924	5.94	1.97	2.15	1.3	0.35	0.3	0	0.08	0.13	0.17	0.11	0.05	0.13	0	0.06	0.04	0.1	0	0.03	0	0.13
GRMZM2G113418	8.79	10.24	12.8	13.69	9.3	8.97	5.82	8.44	4.01	5.42	4	4.93	8.21	4.31	6.18	3.57	6.39	6.39	3.12	3.21	5.18
GRMZM2G052812	21.7	27.85	30.88	34.08	29.67	24.63	18.09	17.05	12.98	19	13.53	15.87	15.14	11.93	12.64	14.41	25.44	23.84	31.39	23.13	23.8
GRMZM2G170281	2.66	3.4	3.21	3.11	3.44	3.14	1.74	1.91	1.61	2.22	1.6	2.05	1.22	1.6	2.65	6.29	12.97	14.32	10.37	11.13	9.39
GRMZM2G156517	17.17	36.05	36.67	35.89	50.31	51.17	42.4	191.5	123.99	77.43	89.12	69.59	87.93	89.76	120.69	91.41	42.37	9.2	14.93	38.72	11.26
GRMZM2G100741	14.82	14.3	17.19	17.48	16.35	17.5	14.46	12.47	9.26	18.3	13.96	13.31	17.83	12.2	19.85	18.5	10.34	17.05	9.9	13.6	9.91
GRMZM2G008528	0.33	0.35	0.14	0.18	0.16	0.25	0	0	0.06	0.03	0.26	0.07	0	0.14	0.25	0.52	1.26	0.44	0.4	0.57	0.23
GRMZM2G075794	0	0.56	0.6	0.25	0.22	0.41	0	0.03	0.12	0.39	0.54	0.25	0	0.77	1.12	0.2	0.31	0.05	0	0.26	0.07
GRMZM2G071112	4.26	2.23	2.08	2.23	0.86	1.39	1.09	1.09	0.22	0.76	0.59	0.67	0.97	0.56	0.13	0.26	0.85	1.69	1.86	1.17	1.6
GRMZM2G024674	0.25	0.2	0	0.89	1.69	0.27	0.42	0.33	0.19	0.31	0.3	0.71	0.87	0.39	1.2	1.11	1.46	0.09	0.14	0.27	0.06
GRMZM5G852876	0	0	0.12	0	0	0	0	0	0	0	0	0	0	0.02	0	0.46	0.06	0.67	0.69	1.47	0.6
GRMZM2G171279	1.34	0.61	0.37	0.3	0.22	0.24	0.14	0.19	0.14	0.23	0.35	0.4	0.99	0.41	0.86	0.28	0.03	0.07	0.15	0.14	0.03
GRMZM2G034110	30.76	26.36	27.13	27.49	29.52	21.7	10.59	9.09	7.35	11.05	7.97	8.31	8.22	7.35	10.67	11.17	11.8	16.99	8.52	10.94	12.48
GRMZM2G147775	2.16	5.25	3.86	3.86	3.31	4.73	3.12	2.65	3.06	4.9	3.51	3.66	3.16	1.79	2.58	0.69	0.54	0.45	0.72	0.99	0.62
GRMZM2G177878	2.06	1.47	1.51	1.75	1.53	3.25	1.23	0.96	0.89	1.46	2.19	1.89	2.07	1.19	2.18	2.69	3.42	1.71	0.77	1.02	0.88
GRMZM2G051330	8.72	9.64	7.68	7.86	6.04	3.59	2.65	2.01	1.68	3.65	3.09	3.57	4.67	2.19	3.35	3.96	4.71	7.56	5.64	7.9	7.49
GRMZM2G004924	11.2	10.6	8.32	4.47	5.74	11.8	6.14	3.51	2.59	5.16	4.3	4.14	3	2.95	3.11	2.98	3.13	5.69	4.58	3.88	3.7
S is days after pollination.
