# Supplementary material for: Genome-Wide Association Analysis for Candidate Genes Contributing to Kernel-Related Traits in Maize
Source: Front Plant Sci. 2022 May 24;13:872292. doi: 10.3389/fpls.2022.872292 (PMC9171146; doi:10.3389/fpls.2022.872292)
Supplement: Supplementary file 6 [file Table_6.XLS]

## Sheet: Table S4
Table S4. Expression of candidate genes during kernel development of maize inbred lines KB182 and KB020.
Candidate gene_V3	Candidate gene_V4	A21-1	A21-2	A21-3	A28-1	A28-2	A28-3	A35-1	A35-2	A35-3	A46-1	A46-2	A46-3	A49-1	A49-2	A49-3	A56-1	A56-2	A56-3	B21-1	B21-2	B21-3	B28-1	B28-2	B28-3	B35-1	B35-2	B35-3	B46-1	B46-2	B46-3	B49-1	B49-2	B49-3	B56-1	B56-2	B56-3
GRMZM2G157580	Zm00001d028237	2.75285	2.07168	3.3433	4.1245	4.26894	4.10007	3.48888	3.02523	2.07841	2.50299	3.04993	4.69193	3.24278	2.58103	3.02422	1.97005	4.54842	3.04241	7.97976	5.32797	8.4921	5.36278	4.56205	6.67325	4.94995	5.54	4.95564	4.41787	5.66297	5.3589	4.28794	5.02994	3.9482	4.76356	5.70692	4.91178
GRMZM2G100741	Zm00001d021873	9.77501	11.2552	9.46668	9.90959	9.23524	11.6834	11.3843	13.4735	13.0318	11.5745	10.8304	9.23329	13.8916	14.2717	12.435	11.844	13.7276	11.3345	2.78219	2.24697	2.51495	1.58057	1.22335	1.34577	1.89876	1.2411	1.44535	1.65316	2.29733	1.45356	1.72872	1.44274	1.68365	2.11148	1.79279	2.81751
GRMZM2G052812	Zm00001d036024	12.2221	7.61999	9.07883	11.6214	15.0494	11.6124	12.2051	10.1121	13.8244	16.1586	13.3184	13.4536	15.604	11.7772	11.8068	12.1395	9.8472	10.1165	5.3734	6.59115	5.26212	3.44701	2.24369	3.05783	1.83296	1.12005	1.79372	8.19968	2.1087	1.70825	1.41273	2.42352	1.86588	1.74765	2.26331	2.63008
GRMZM2G359521	Zm00001d005752	4.58304	2.80908	4.02724	3.99553	3.60958	2.64803	5.08375	2.94633	2.8435	3.31812	2.45959	3.039	3.05561	2.03718	2.01172	1.88048	1.65797	0.715264	6.2539	4.88899	4.86961	4.04071	3.19333	3.63591	1.55967	1.56056	1.85079	2.94044	1.78398	2.17477	1.43826	2.72636	2.56434	1.95427	2.13417	2.01373
GRMZM2G024693	Zm00001d017026	15.4252	19.3502	15.9514	18.1136	15.6912	15.464	18.3295	16.4436	17.5296	19.3001	14.4834	18.0867	19.1784	7.00437	14.8583	13.3365	8.94525	4.85898	34.4272	23.5128	26.1748	22.4652	31.8293	25.9648	20.7023	29.1707	32.0024	5.89499	25.3605	26.6528	34.4986	24.3099	19.1408	29.7697	46.3048	30.759
GRMZM2G034110	Zm00001d000184	8.27914	4.47178	8.4434	6.95005	12.295	11.2049	10.4408	7.9788	8.43254	9.3133	9.66165	10.9404	19.3027	17.5879	18.3095	13.9597	26.8121	23.5062	10.4753	12.0259	8.45782	8.23497	5.55096	7.21646	8.70301	5.26996	6.71653	6.74963	4.98465	4.52625	7.40554	5.62992	7.53022	9.00609	8.64408	8.97111
GRMZM5G826218	Zm00001d012293	2.29815	2.38762	3.15902	4.80098	30.9745	16.5363	64.5057	55.9988	82.251	144.27	89.634	130.058	321.416	505.324	432.083	480.91	524.274	729.07	3.21446	2.18122	2.26279	17.0922	8.98761	8.74885	28.8158	8.4064	7.79955	4.02802	51.3635	50.491	35.2979	51.1037	46.2526	64.2989	155.022	122.44
GRMZM2G354579	Zm00001d044607	2.6245	2.78301	1.70664	3.83917	1.67923	2.51236	2.39347	3.24863	2.44115	5.15497	1.61463	1.01738	0.890825	0	1.10173	0	0	0	1.07882	0.59773	1.1581	0.496148	0.742995	0.60442	0.299611	0.311334	0.66992	8.51274	0.35953	0.275915	0.568492	0.632181	1.34268	0.968274	0.533032	1.20815
GRMZM2G156517	Zm00001d037052	91.6053	129.605	98.0874	84.3106	68.8417	53.1339	133.447	130.949	123.929	104.972	94.7086	58.2241	33.2682	15.8456	24.9096	17.0386	12.2455	9.92074	79.6207	61.193	74.7578	46.4916	71.7455	54.9865	124.636	134.981	133.07	60.3632	95.514	131.14	110.895	69.5686	95.8548	98.7626	91.0819	111.832
GRMZM2G149647	Zm00001d028408	1.57502	0.283103	0.156155	5.53779	17.0751	7.89635	53.0591	56.868	67.1032	34.2193	20.111	16.0643	112.261	77.5162	194.225	28.4162	46.6282	66.2524	0.920617	1.00048	0.912077	2.03487	1.35556	1.26925	4.02731	0.972221	1.41791	3.99548	5.1659	4.10381	2.9046	2.56297	2.47381	2.74923	18.284	6.71809
GRMZM2G046919	Zm00001d027611	0.92954	0.400407	0.482477	0.457179	0.612402	0.567414	0.54837	0.477101	0.520748	0.579982	0.324056	0.768406	0.703188	0.839134	0.93934	1.16165	1.13237	1.46884	0.651606	0.561926	0.604413	0.435854	0.107202	0.387914	0.255235	0.328322	0.421844	0.240586	0.198946	0.391455	0.318327	0.495735	0.304812	0.036332	0.435765	0.171569
GRMZM2G027307	Zm00001d004169	13.6108	14.832	15.4136	14.0125	16.3418	15.9889	18.9332	17.5226	18.6697	20.9588	16.0839	16.4072	31.1585	39.2083	30.5176	29.0047	30.1809	30.4509	16.3521	16.4776	16.4772	12.4986	9.80703	11.9977	16.9163	10.0381	11.1953	14.2311	12.1837	11.7755	14.0851	13.5874	13.8136	15.9414	17.3609	17.1831
GRMZM2G498535	Zm00001d004176	20.2985	15.2806	19.2423	24.8438	30.9633	26.0906	27.5232	23.6163	25.377	35.9661	27.5387	27.7432	48.2468	97.8778	63.3762	63.1938	56.8885	54.9701	28.5687	25.4795	27.5971	27.556	18.4643	22.0805	24.391	15.3317	17.6254	25.766	23.1636	20.1903	24.5993	27.777	28.6128	28.4228	37.7334	33.9173
GRMZM2G169820	Zm00001d031522	10.947	3.69561	8.47269	8.18965	14.0783	18.3726	11.9438	11.5343	13.9063	17.1885	15.7753	17.3251	37.3215	47.7987	31.2755	37.6383	43.7236	49.3017	16.5947	17.4468	15.9806	11.4366	7.44958	10.1926	10.9119	7.58223	11.8351	3.88709	9.86345	10.6275	13.9602	12.5372	13.2826	13.6969	17.9502	14.7502
GRMZM2G122431	Zm00001d041972	2.55226	0.4181	1.83824	2.78525	8.02445	6.58125	4.62488	3.19091	3.78914	6.20873	4.21857	4.93825	9.74555	5.39868	9.42561	15.6923	6.36545	20.2504	2.08109	2.31949	1.85115	1.20867	0.736088	1.39503	3.5147	2.0441	3.72964	3.11832	1.76131	2.817	1.18522	4.96971	3.94951	2.30289	5.63956	3.39967
GRMZM2G420357	Zm00001d027998	2.01207	1.57031	1.28056	2.25338	1.92868	2.71566	3.6698	4.35698	5.48713	4.48932	2.27168	3.37302	8.37402	9.73178	9.82195	8.01821	6.66856	8.74728	3.10318	2.6819	2.08247	2.88697	2.03595	2.55668	2.61909	2.54272	2.94449	1.41353	1.2075	1.46814	0.800909	1.76335	1.59056	1.85488	3.48957	1.47678
GRMZM2G113418	Zm00001d018192	7.02579	7.08082	6.06365	5.891	6.39812	7.7498	7.61264	8.1211	8.39429	9.72168	11.8665	9.19928	8.86585	4.30258	7.13658	4.96312	4.11943	4.11971	10.2824	9.8817	8.46903	8.49963	5.69029	8.74942	10.4038	6.06886	9.45771	5.64106	9.4804	9.39375	7.26807	8.81292	6.44573	7.11303	9.81944	12.4248
A is KB182; B is KB020.
The number is days after pollination(DAP).
