# Supplementary material for: Genome-Wide Association Analysis for Candidate Genes Contributing to Kernel-Related Traits in Maize
Source: Front Plant Sci. 2022 May 24;13:872292. doi: 10.3389/fpls.2022.872292 (PMC9171146; doi:10.3389/fpls.2022.872292)
Supplement: Supplementary file 8 [file Table_8.XLS]

## Sheet: Table S7
Table S7. Go enrichment analysis results of 14 candidate genes.
per	ratio	class	GO ID	Descrption	Pvalue	Qvalue	fg_num	bg_num	Genes
7.143	1	Biological Process	GO:2000469	negative regulation of peroxidase activity	0.000356017	0.129946	1	1	Zm00001d000184
7.143	0.333	Biological Process	GO:2000468	regulation of peroxidase activity	0.0010677	0.173176	1	3	Zm00001d000184
7.143	0.25	Biological Process	GO:0051354	negative regulation of oxidoreductase activity	0.00142336	0.173176	1	4	Zm00001d000184
7.143	0.25	Molecular Function	GO:0004506	squalene monooxygenase activity	0.00149539	0.073274	1	4	Zm00001d021873
7.143	0.25	Molecular Function	GO:0019003	GDP binding	0.00149539	0.073274	1	4	Zm00001d017026
14.286	0.009	Biological Process	GO:0010150	leaf senescence	0.0027124	0.194565	2	220	Zm00001d000184;Zm00001d004169
7.143	0.125	Molecular Function	GO:0004109	coproporphyrinogen oxidase activity	0.0029887	0.0976308	1	8	Zm00001d028408
7.143	0.125	Cellular Component	GO:0000138	Golgi trans cisterna	0.00304658	0.0854436	1	8	Zm00001d004169
7.143	0.125	Cellular Component	GO:0000427	plastid-encoded plastid RNA polymerase complex	0.00304658	0.0854436	1	8	Zm00001d028408
7.143	0.111	Biological Process	GO:0018345	protein palmitoylation	0.00319992	0.194565	1	9	Zm00001d004169
21.429	0.003	Biological Process	GO:0009733	response to auxin	0.00391344	0.194565	3	927	Zm00001d000184;Zm00001d031522;Zm00001d036024
14.286	0.007	Biological Process	GO:0010260	organ senescence	0.0041652	0.194565	2	274	Zm00001d000184;Zm00001d004169
7.143	0.083	Biological Process	GO:0009833	plant-type primary cell wall biogenesis	0.00426444	0.194565	1	12	Zm00001d041972
14.286	0.007	Molecular Function	GO:0000976	transcription regulatory region sequence-specific DNA binding	0.00505109	0.11313	2	288	Zm00001d000184;Zm00001d041972
7.143	0.071	Cellular Component	GO:0043025	neuronal cell body	0.00532586	0.0854436	1	14	Zm00001d017026
7.143	0.067	Cellular Component	GO:0044297	cell body	0.00570527	0.0854436	1	15	Zm00001d017026
7.143	0.062	Molecular Function	GO:0031593	polyubiquitin binding	0.0059691	0.11313	1	16	Zm00001d028237
14.286	0.006	Molecular Function	GO:1990837	sequence-specific double-stranded DNA binding	0.00692632	0.11313	2	339	Zm00001d000184;Zm00001d041972
14.286	0.005	Biological Process	GO:0042157	lipoprotein metabolic process	0.0082918	0.254153	2	391	Zm00001d004169;Zm00001d005752
14.286	0.005	Biological Process	GO:0009734	auxin-activated signaling pathway	0.00837356	0.254153	2	393	Zm00001d031522;Zm00001d036024
7.143	0.042	Biological Process	GO:1900055	regulation of leaf senescence	0.00851199	0.254153	1	24	Zm00001d004169
7.143	0.042	Cellular Component	GO:0036477	somatodendritic compartment	0.0091139	0.0854436	1	24	Zm00001d017026
7.143	0.042	Cellular Component	GO:0042644	chloroplast nucleoid	0.0091139	0.0854436	1	24	Zm00001d028408
14.286	0.005	Biological Process	GO:0071365	cellular response to auxin stimulus	0.0091258	0.254153	2	411	Zm00001d031522;Zm00001d036024
7.143	0.038	Biological Process	GO:0030100	regulation of endocytosis	0.00921828	0.254153	1	26	Zm00001d017026
7.143	0.036	Biological Process	GO:0030307	positive regulation of cell growth	0.00992409	0.254153	1	28	Zm00001d000184
92.857	0.001	Cellular Component	GO:0043231	intracellular membrane-bounded organelle	0.0102924	0.0854436	13	22488	Zm00001d000184;Zm00001d004169;Zm00001d017026;Zm00001d018192;Zm00001d021873;Zm00001d027611;Zm00001d027998;Zm00001d028237;Zm00001d028408;Zm00001d031522;Zm00001d036024;Zm00001d037052;Zm00001d041972
92.857	0.001	Cellular Component	GO:0043227	membrane-bounded organelle	0.0103568	0.0854436	13	22500	Zm00001d000184;Zm00001d004169;Zm00001d017026;Zm00001d018192;Zm00001d021873;Zm00001d027611;Zm00001d027998;Zm00001d028237;Zm00001d028408;Zm00001d031522;Zm00001d036024;Zm00001d037052;Zm00001d041972
14.286	0.005	Biological Process	GO:0007568	aging	0.0104446	0.254153	2	441	Zm00001d000184;Zm00001d004169
14.286	0.005	Molecular Function	GO:0016627	oxidoreductase activity, acting on the CH-CH group of donors	0.0109854	0.122081	2	431	Zm00001d004169;Zm00001d028408
7.143	0.029	Biological Process	GO:0051341	regulation of oxidoreductase activity	0.0120388	0.274634	1	34	Zm00001d000184
7.143	0.029	Molecular Function	GO:0016634	oxidoreductase activity, acting on the CH-CH group of donors, oxygen as acceptor	0.0126448	0.122081	1	34	Zm00001d028408
14.286	0.004	Biological Process	GO:0009642	response to light intensity	0.0132702	0.284918	2	500	Zm00001d000184;Zm00001d028408
7.143	0.024	Biological Process	GO:0016925	protein sumoylation	0.0145006	0.294039	1	41	Zm00001d037052
42.857	0.001	Cellular Component	GO:0009536	plastid	0.0147248	0.101509	6	5796	Zm00001d017026;Zm00001d018192;Zm00001d021873;Zm00001d027998;Zm00001d028408;Zm00001d036024
14.286	0.004	Molecular Function	GO:0003690	double-stranded DNA binding	0.0151865	0.122081	2	511	Zm00001d000184;Zm00001d041972
14.286	0.004	Molecular Function	GO:0044212	transcription regulatory region DNA binding	0.0165047	0.122081	2	534	Zm00001d000184;Zm00001d041972
14.286	0.004	Molecular Function	GO:0000975	regulatory region DNA binding	0.0166216	0.122081	2	536	Zm00001d000184;Zm00001d041972
14.286	0.004	Molecular Function	GO:0001067	regulatory region nucleic acid binding	0.0166216	0.122081	2	536	Zm00001d000184;Zm00001d041972
7.143	0.023	Cellular Component	GO:0097458	neuron part	0.0166498	0.101509	1	44	Zm00001d017026
7.143	0.021	Molecular Function	GO:0019706	protein-cysteine S-palmitoyltransferase activity	0.0174402	0.122081	1	47	Zm00001d004169
7.143	0.021	Molecular Function	GO:0019707	protein-cysteine S-acyltransferase activity	0.0174402	0.122081	1	47	Zm00001d004169
7.143	0.019	Biological Process	GO:0030004	cellular monovalent inorganic cation homeostasis	0.0190574	0.366102	1	54	Zm00001d027998
92.857	0.001	Cellular Component	GO:0043229	intracellular organelle	0.019301	0.101509	13	23741	Zm00001d000184;Zm00001d004169;Zm00001d017026;Zm00001d018192;Zm00001d021873;Zm00001d027611;Zm00001d027998;Zm00001d028237;Zm00001d028408;Zm00001d031522;Zm00001d036024;Zm00001d037052;Zm00001d041972
7.143	0.019	Cellular Component	GO:0042646	plastid nucleoid	0.0196493	0.101509	1	52	Zm00001d028408
92.857	0.001	Cellular Component	GO:0043226	organelle	0.0199943	0.101509	13	23814	Zm00001d000184;Zm00001d004169;Zm00001d017026;Zm00001d018192;Zm00001d021873;Zm00001d027611;Zm00001d027998;Zm00001d028237;Zm00001d028408;Zm00001d031522;Zm00001d036024;Zm00001d037052;Zm00001d041972
7.143	0.017	Biological Process	GO:2000024	regulation of leaf development	0.0208048	0.379687	1	59	Zm00001d004169
7.143	0.016	Molecular Function	GO:0016409	palmitoyltransferase activity	0.0225803	0.140547	1	61	Zm00001d004169
7.143	0.016	Molecular Function	GO:0016417	S-acyltransferase activity	0.0229465	0.140547	1	62	Zm00001d004169
7.143	0.015	Biological Process	GO:0010252	auxin homeostasis	0.0239428	0.416149	1	68	Zm00001d000184
7.143	0.013	Biological Process	GO:0009646	response to absence of light	0.0270715	0.438086	1	77	Zm00001d000184
7.143	0.012	Biological Process	GO:0000122	negative regulation of transcription from RNA polymerase II promoter	0.0288057	0.438086	1	82	Zm00001d000184
7.143	0.012	Biological Process	GO:0045927	positive regulation of growth	0.0288057	0.438086	1	82	Zm00001d000184
7.143	0.013	Cellular Component	GO:0031985	Golgi cisterna	0.0297098	0.136445	1	79	Zm00001d004169
42.857	0.001	Cellular Component	GO:0005886	plasma membrane	0.0310101	0.136445	6	6798	Zm00001d004169;Zm00001d005752;Zm00001d017026;Zm00001d036024;Zm00001d037052;Zm00001d041972
7.143	0.011	Molecular Function	GO:0043130	ubiquitin binding	0.0324229	0.168962	1	88	Zm00001d028237
7.143	0.01	Biological Process	GO:0055067	monovalent inorganic cation homeostasis	0.0353693	0.506195	1	101	Zm00001d027998
7.143	0.01	Molecular Function	GO:0043621	protein self-association	0.0360449	0.168962	1	98	Zm00001d028408
7.143	0.01	Biological Process	GO:0060627	regulation of vesicle-mediated transport	0.0360578	0.506195	1	103	Zm00001d017026
7.143	0.01	Molecular Function	GO:0032182	ubiquitin-like protein binding	0.0364064	0.168962	1	99	Zm00001d028237
7.143	0.01	Cellular Component	GO:0009295	nucleoid	0.0367319	0.147014	1	98	Zm00001d028408
71.429	0.001	Molecular Function	GO:1901363	heterocyclic compound binding	0.037364	0.168962	10	16546	Zm00001d000184;Zm00001d017026;Zm00001d018192;Zm00001d021873;Zm00001d027611;Zm00001d027998;Zm00001d028237;Zm00001d031522;Zm00001d037052;Zm00001d041972
71.429	0.001	Molecular Function	GO:0097159	organic cyclic compound binding	0.037632	0.168962	10	16562	Zm00001d000184;Zm00001d017026;Zm00001d018192;Zm00001d021873;Zm00001d027611;Zm00001d027998;Zm00001d028237;Zm00001d031522;Zm00001d037052;Zm00001d041972
7.143	0.009	Molecular Function	GO:0016760	cellulose synthase (UDP-forming) activity	0.0392939	0.168962	1	107	Zm00001d041972
7.143	0.009	Molecular Function	GO:0016759	cellulose synthase activity	0.0396543	0.168962	1	108	Zm00001d041972
14.286	0.002	Biological Process	GO:0048366	leaf development	0.0408157	0.551768	2	914	Zm00001d000184;Zm00001d004169
7.143	0.009	Cellular Component	GO:0005795	Golgi stack	0.0418758	0.147014	1	112	Zm00001d004169
14.286	0.002	Cellular Component	GO:0005768	endosome	0.0424416	0.147014	2	872	Zm00001d004169;Zm00001d017026
50	0.001	Molecular Function	GO:0003676	nucleic acid binding	0.0426747	0.174255	7	9561	Zm00001d000184;Zm00001d018192;Zm00001d027611;Zm00001d027998;Zm00001d028237;Zm00001d031522;Zm00001d041972
7.143	0.009	Cellular Component	GO:0005769	early endosome	0.0437067	0.147014	1	117	Zm00001d004169
35.714	0.001	Cellular Component	GO:0009507	chloroplast	0.0445496	0.147014	5	5439	Zm00001d017026;Zm00001d018192;Zm00001d021873;Zm00001d028408;Zm00001d036024
28.571	0.001	Molecular Function	GO:0016491	oxidoreductase activity	0.044704	0.17524	4	3759	Zm00001d004169;Zm00001d021873;Zm00001d028408;Zm00001d036024
14.286	0.002	Biological Process	GO:0046686	response to cadmium ion	0.0468174	0.60658	2	986	Zm00001d000184;Zm00001d036024
14.286	0.002	Biological Process	GO:0051128	regulation of cellular component organization	0.048194	0.60658	2	1002	Zm00001d000184;Zm00001d017026
21.429	0.001	Cellular Component	GO:0005794	Golgi apparatus	0.0517858	0.162755	3	2276	Zm00001d004169;Zm00001d017026;Zm00001d041972
7.143	0.007	Biological Process	GO:1901069	guanosine-containing compound catabolic process	0.0531228	0.613651	1	153	Zm00001d017026
14.286	0.002	Biological Process	GO:0048878	chemical homeostasis	0.0536699	0.613651	2	1064	Zm00001d000184;Zm00001d027998
7.143	0.006	Biological Process	GO:0010286	heat acclimation	0.0537995	0.613651	1	155	Zm00001d028408
7.143	0.006	Molecular Function	GO:0000977	RNA polymerase II regulatory region sequence-specific DNA binding	0.0599893	0.217739	1	165	Zm00001d041972
7.143	0.006	Molecular Function	GO:0001012	RNA polymerase II regulatory region DNA binding	0.0599893	0.217739	1	165	Zm00001d041972
7.143	0.006	Biological Process	GO:0046039	GTP metabolic process	0.0622208	0.676014	1	180	Zm00001d017026
92.857	0	Molecular Function	GO:0005488	binding	0.0651787	0.228125	13	26963	Zm00001d000184;Zm00001d004169;Zm00001d005752;Zm00001d017026;Zm00001d018192;Zm00001d021873;Zm00001d027611;Zm00001d027998;Zm00001d028237;Zm00001d028408;Zm00001d031522;Zm00001d037052;Zm00001d041972
14.286	0.002	Cellular Component	GO:0044431	Golgi apparatus part	0.0664829	0.191386	2	1121	Zm00001d004169;Zm00001d041972
100	0	Cellular Component	GO:0044464	cell part	0.0684288	0.191386	14	30317	Zm00001d000184;Zm00001d004169;Zm00001d005752;Zm00001d017026;Zm00001d018192;Zm00001d021873;Zm00001d027611;Zm00001d027998;Zm00001d028237;Zm00001d028408;Zm00001d031522;Zm00001d036024;Zm00001d037052;Zm00001d041972
100	0	Cellular Component	GO:0005623	cell	0.0714276	0.191386	14	30410	Zm00001d000184;Zm00001d004169;Zm00001d005752;Zm00001d017026;Zm00001d018192;Zm00001d021873;Zm00001d027611;Zm00001d027998;Zm00001d028237;Zm00001d028408;Zm00001d031522;Zm00001d036024;Zm00001d037052;Zm00001d041972
7.143	0.005	Biological Process	GO:1901068	guanosine-containing compound metabolic process	0.0722345	0.676014	1	210	Zm00001d017026
42.857	0.001	Cellular Component	GO:0071944	cell periphery	0.0724948	0.191386	6	8255	Zm00001d004169;Zm00001d005752;Zm00001d017026;Zm00001d036024;Zm00001d037052;Zm00001d041972
14.286	0.002	Biological Process	GO:0010038	response to metal ion	0.0739702	0.676014	2	1276	Zm00001d000184;Zm00001d036024
7.143	0.005	Biological Process	GO:0001558	regulation of cell growth	0.0742253	0.676014	1	216	Zm00001d000184
7.143	0.005	Biological Process	GO:0010207	photosystem II assembly	0.0752192	0.676014	1	219	Zm00001d018192
92.857	0	Cellular Component	GO:0044424	intracellular part	0.0758102	0.192441	13	26818	Zm00001d000184;Zm00001d004169;Zm00001d017026;Zm00001d018192;Zm00001d021873;Zm00001d027611;Zm00001d027998;Zm00001d028237;Zm00001d028408;Zm00001d031522;Zm00001d036024;Zm00001d037052;Zm00001d041972
7.143	0.004	Biological Process	GO:0030244	cellulose biosynthetic process	0.0765429	0.676014	1	223	Zm00001d041972
7.143	0.004	Biological Process	GO:0006623	protein targeting to vacuole	0.078195	0.676014	1	228	Zm00001d017026
7.143	0.004	Biological Process	GO:0072665	protein localization to vacuole	0.078195	0.676014	1	228	Zm00001d017026
7.143	0.004	Biological Process	GO:0072666	establishment of protein localization to vacuole	0.078195	0.676014	1	228	Zm00001d017026
21.429	0.001	Biological Process	GO:0010035	response to inorganic substance	0.0803695	0.676014	3	2920	Zm00001d000184;Zm00001d028408;Zm00001d036024
7.143	0.004	Biological Process	GO:0016556	mRNA modification	0.0808326	0.676014	1	236	Zm00001d027611
14.286	0.001	Biological Process	GO:0016049	cell growth	0.0853678	0.676014	2	1386	Zm00001d000184;Zm00001d017026
7.143	0.004	Molecular Function	GO:0016709	oxidoreductase activity, acting on paired donors, with incorporation or reduction of molecular oxygen, NAD(P)H as one donor, and incorporation of one atom of oxygen	0.0864811	0.28723	1	241	Zm00001d021873
7.143	0.004	Molecular Function	GO:0032440	2-alkenal reductase [NAD(P)] activity	0.0881995	0.28723	1	246	Zm00001d004169
85.714	0	Biological Process	GO:0044260	cellular macromolecule metabolic process	0.0882135	0.676014	12	25703	Zm00001d000184;Zm00001d004169;Zm00001d005752;Zm00001d018192;Zm00001d021873;Zm00001d027611;Zm00001d027998;Zm00001d028237;Zm00001d028408;Zm00001d031522;Zm00001d037052;Zm00001d041972
7.143	0.004	Biological Process	GO:0006875	cellular metal ion homeostasis	0.0887036	0.676014	1	260	Zm00001d027998
14.286	0.001	Molecular Function	GO:0043565	sequence-specific DNA binding	0.0908586	0.28723	2	1368	Zm00001d000184;Zm00001d041972
7.143	0.004	Biological Process	GO:0051274	beta-glucan biosynthetic process	0.0952149	0.676014	1	280	Zm00001d041972
28.571	0.001	Molecular Function	GO:0003677	DNA binding	0.097736	0.297398	4	4863	Zm00001d000184;Zm00001d028237;Zm00001d031522;Zm00001d041972
7.143	0.003	Biological Process	GO:0048527	lateral root development	0.0984544	0.676014	1	290	Zm00001d000184
7.143	0.004	Molecular Function	GO:0050660	flavin adenine dinucleotide binding	0.100144	0.297398	1	281	Zm00001d021873
14.286	0.001	Biological Process	GO:0048827	phyllome development	0.103537	0.676014	2	1552	Zm00001d000184;Zm00001d004169
7.143	0.003	Biological Process	GO:0006497	protein lipidation	0.103937	0.676014	1	307	Zm00001d004169
7.143	0.003	Biological Process	GO:0042158	lipoprotein biosynthetic process	0.104258	0.676014	1	308	Zm00001d004169
7.143	0.003	Biological Process	GO:2000377	regulation of reactive oxygen species metabolic process	0.104901	0.676014	1	310	Zm00001d004169
92.857	0	Cellular Component	GO:0005622	intracellular	0.105248	0.244648	13	27646	Zm00001d000184;Zm00001d004169;Zm00001d017026;Zm00001d018192;Zm00001d021873;Zm00001d027611;Zm00001d027998;Zm00001d028237;Zm00001d028408;Zm00001d031522;Zm00001d036024;Zm00001d037052;Zm00001d041972
7.143	0.003	Cellular Component	GO:0000428	DNA-directed RNA polymerase complex	0.107497	0.244648	1	297	Zm00001d028408
7.143	0.003	Cellular Component	GO:0030880	RNA polymerase complex	0.107497	0.244648	1	297	Zm00001d028408
7.143	0.003	Biological Process	GO:0048528	post-embryonic root development	0.108108	0.676014	1	320	Zm00001d000184
7.143	0.003	Molecular Function	GO:0051536	iron-sulfur cluster binding	0.10825	0.303101	1	305	Zm00001d028408
7.143	0.003	Molecular Function	GO:0051540	metal cluster binding	0.10825	0.303101	1	305	Zm00001d028408
21.429	0.001	Molecular Function	GO:0008270	zinc ion binding	0.111446	0.30338	3	3197	Zm00001d000184;Zm00001d004169;Zm00001d027611
7.143	0.003	Biological Process	GO:0007034	vacuolar transport	0.111943	0.676014	1	332	Zm00001d017026
100	0	Biological Process	GO:0044238	primary metabolic process	0.115102	0.676014	14	33698	Zm00001d000184;Zm00001d004169;Zm00001d005752;Zm00001d017026;Zm00001d018192;Zm00001d021873;Zm00001d027611;Zm00001d027998;Zm00001d028237;Zm00001d028408;Zm00001d031522;Zm00001d036024;Zm00001d037052;Zm00001d041972
7.143	0.003	Molecular Function	GO:0003743	translation initiation factor activity	0.115622	0.306241	1	327	Zm00001d018192
7.143	0.003	Biological Process	GO:0006888	ER to Golgi vesicle-mediated transport	0.117349	0.676014	1	349	Zm00001d017026
7.143	0.003	Biological Process	GO:0000281	mitotic cytokinesis	0.117666	0.676014	1	350	Zm00001d041972
64.286	0.001	Cellular Component	GO:0044444	cytoplasmic part	0.118209	0.260061	9	16508	Zm00001d004169;Zm00001d017026;Zm00001d018192;Zm00001d021873;Zm00001d027611;Zm00001d027998;Zm00001d028408;Zm00001d036024;Zm00001d041972
7.143	0.003	Biological Process	GO:0009739	response to gibberellin	0.11925	0.676014	1	355	Zm00001d000184
7.143	0.003	Molecular Function	GO:0016628	oxidoreductase activity, acting on the CH-CH group of donors, NAD or NADP as acceptor	0.119286	0.307633	1	338	Zm00001d004169
7.143	0.003	Biological Process	GO:0061640	cytoskeleton-dependent cytokinesis	0.119566	0.676014	1	356	Zm00001d041972
7.143	0.003	Biological Process	GO:0007264	small GTPase mediated signal transduction	0.122409	0.676014	1	365	Zm00001d017026
7.143	0.003	Biological Process	GO:0009744	response to sucrose	0.122724	0.676014	1	366	Zm00001d000184
7.143	0.003	Biological Process	GO:0034285	response to disaccharide	0.124614	0.676014	1	372	Zm00001d000184
7.143	0.003	Biological Process	GO:0009644	response to high light intensity	0.125558	0.676014	1	375	Zm00001d028408
7.143	0.003	Molecular Function	GO:0016881	acid-amino acid ligase activity	0.125913	0.316396	1	358	Zm00001d037052
7.143	0.003	Biological Process	GO:0055065	metal ion homeostasis	0.126186	0.676014	1	377	Zm00001d027998
7.143	0.003	Biological Process	GO:0030243	cellulose metabolic process	0.127442	0.676014	1	381	Zm00001d041972
7.143	0.003	Biological Process	GO:0006897	endocytosis	0.132449	0.676014	1	397	Zm00001d017026
7.143	0.002	Biological Process	GO:0019684	photosynthesis, light reaction	0.137118	0.676014	1	412	Zm00001d018192
7.143	0.002	Biological Process	GO:0009832	plant-type cell wall biogenesis	0.138049	0.676014	1	415	Zm00001d041972
7.143	0.003	Molecular Function	GO:0003924	GTPase activity	0.13805	0.335418	1	395	Zm00001d017026
71.429	0.001	Cellular Component	GO:0005737	cytoplasm	0.139606	0.297225	10	19627	Zm00001d004169;Zm00001d017026;Zm00001d018192;Zm00001d021873;Zm00001d027611;Zm00001d027998;Zm00001d028408;Zm00001d036024;Zm00001d037052;Zm00001d041972
7.143	0.002	Molecular Function	GO:0035251	UDP-glucosyltransferase activity	0.140328	0.335418	1	402	Zm00001d041972
71.429	0	Biological Process	GO:0034641	cellular nitrogen compound metabolic process	0.141381	0.676014	10	21062	Zm00001d000184;Zm00001d017026;Zm00001d018192;Zm00001d021873;Zm00001d027611;Zm00001d027998;Zm00001d028237;Zm00001d028408;Zm00001d031522;Zm00001d037052
7.143	0.002	Biological Process	GO:0051273	beta-glucan metabolic process	0.145771	0.676014	1	440	Zm00001d041972
7.143	0.002	Molecular Function	GO:0046527	glucosyltransferase activity	0.14713	0.343303	1	423	Zm00001d041972
7.143	0.002	Biological Process	GO:0000910	cytokinesis	0.149762	0.676014	1	453	Zm00001d041972
7.143	0.002	Cellular Component	GO:0061695	transferase complex, transferring phosphorus-containing groups	0.15174	0.312963	1	429	Zm00001d028408
7.143	0.002	Biological Process	GO:0009658	chloroplast organization	0.151903	0.676014	1	460	Zm00001d028408
7.143	0.002	Biological Process	GO:0098771	inorganic ion homeostasis	0.151903	0.676014	1	460	Zm00001d027998
7.143	0.002	Biological Process	GO:0030003	cellular cation homeostasis	0.15769	0.676014	1	479	Zm00001d027998
7.143	0.002	Biological Process	GO:0043543	protein acylation	0.15769	0.676014	1	479	Zm00001d004169
21.429	0.001	Biological Process	GO:0009725	response to hormone	0.159866	0.676014	3	3950	Zm00001d000184;Zm00001d031522;Zm00001d036024
14.286	0.001	Biological Process	GO:0040007	growth	0.163016	0.676014	2	2046	Zm00001d000184;Zm00001d017026
100	0	Biological Process	GO:0044237	cellular metabolic process	0.163079	0.676014	14	34547	Zm00001d000184;Zm00001d004169;Zm00001d005752;Zm00001d017026;Zm00001d018192;Zm00001d021873;Zm00001d027611;Zm00001d027998;Zm00001d028237;Zm00001d028408;Zm00001d031522;Zm00001d036024;Zm00001d037052;Zm00001d041972
14.286	0.001	Biological Process	GO:0009755	hormone-mediated signaling pathway	0.16327	0.676014	2	2048	Zm00001d031522;Zm00001d036024
7.143	0.002	Biological Process	GO:0061025	membrane fusion	0.165249	0.676014	1	504	Zm00001d017026
7.143	0.002	Biological Process	GO:0042542	response to hydrogen peroxide	0.168255	0.676014	1	514	Zm00001d028408
7.143	0.002	Cellular Component	GO:0000502	proteasome complex	0.169245	0.338477	1	483	Zm00001d037052
85.714	0	Biological Process	GO:0043170	macromolecule metabolic process	0.170034	0.676014	12	27710	Zm00001d000184;Zm00001d004169;Zm00001d005752;Zm00001d018192;Zm00001d021873;Zm00001d027611;Zm00001d027998;Zm00001d028237;Zm00001d028408;Zm00001d031522;Zm00001d037052;Zm00001d041972
7.143	0.002	Biological Process	GO:0006650	glycerophospholipid metabolic process	0.170952	0.676014	1	523	Zm00001d005752
7.143	0.002	Cellular Component	GO:0005802	trans-Golgi network	0.174367	0.338477	1	499	Zm00001d004169
14.286	0.001	Biological Process	GO:0032870	cellular response to hormone stimulus	0.174643	0.676014	2	2137	Zm00001d031522;Zm00001d036024
7.143	0.002	Biological Process	GO:0006873	cellular ion homeostasis	0.175726	0.676014	1	539	Zm00001d027998
7.143	0.002	Molecular Function	GO:0005525	GTP binding	0.177593	0.368146	1	519	Zm00001d017026
7.143	0.002	Molecular Function	GO:0016879	ligase activity, forming carbon-nitrogen bonds	0.178217	0.368146	1	521	Zm00001d037052
7.143	0.002	Molecular Function	GO:0004497	monooxygenase activity	0.178529	0.368146	1	522	Zm00001d021873
50	0.001	Molecular Function	GO:0043167	ion binding	0.178603	0.368146	7	13014	Zm00001d000184;Zm00001d004169;Zm00001d005752;Zm00001d017026;Zm00001d021873;Zm00001d027611;Zm00001d037052
50	0.001	Biological Process	GO:0009059	macromolecule biosynthetic process	0.17997	0.676014	7	13698	Zm00001d000184;Zm00001d004169;Zm00001d005752;Zm00001d027998;Zm00001d028408;Zm00001d031522;Zm00001d041972
14.286	0.001	Biological Process	GO:0009416	response to light stimulus	0.180969	0.676014	2	2186	Zm00001d000184;Zm00001d028408
7.143	0.002	Molecular Function	GO:0032561	guanyl ribonucleotide binding	0.182571	0.368146	1	535	Zm00001d017026
7.143	0.002	Molecular Function	GO:0019001	guanyl nucleotide binding	0.185359	0.368146	1	544	Zm00001d017026
21.429	0.001	Biological Process	GO:0055114	oxidation-reduction process	0.185451	0.676014	3	4235	Zm00001d018192;Zm00001d021873;Zm00001d036024
7.143	0.002	Molecular Function	GO:0016614	oxidoreductase activity, acting on CH-OH group of donors	0.186904	0.368146	1	549	Zm00001d036024
7.143	0.002	Molecular Function	GO:0008135	translation factor activity, RNA binding	0.187829	0.368146	1	552	Zm00001d018192
7.143	0.002	Biological Process	GO:0015979	photosynthesis	0.189017	0.676014	1	584	Zm00001d018192
7.143	0.002	Biological Process	GO:0009408	response to heat	0.190481	0.676014	1	589	Zm00001d028408
7.143	0.002	Biological Process	GO:0055082	cellular chemical homeostasis	0.190481	0.676014	1	589	Zm00001d027998
7.143	0.002	Biological Process	GO:0043086	negative regulation of catalytic activity	0.191066	0.676014	1	591	Zm00001d000184
14.286	0.001	Biological Process	GO:0009314	response to radiation	0.196106	0.676014	2	2302	Zm00001d000184;Zm00001d028408
14.286	0.001	Biological Process	GO:0071495	cellular response to endogenous stimulus	0.196894	0.676014	2	2308	Zm00001d031522;Zm00001d036024
71.429	0	Biological Process	GO:0006807	nitrogen compound metabolic process	0.196981	0.676014	10	22216	Zm00001d000184;Zm00001d017026;Zm00001d018192;Zm00001d021873;Zm00001d027611;Zm00001d027998;Zm00001d028237;Zm00001d028408;Zm00001d031522;Zm00001d037052
7.143	0.002	Biological Process	GO:0055080	cation homeostasis	0.200085	0.676014	1	622	Zm00001d027998
7.143	0.002	Biological Process	GO:0046486	glycerolipid metabolic process	0.200374	0.676014	1	623	Zm00001d005752
7.143	0.002	Cellular Component	GO:0098791	Golgi subcompartment	0.204488	0.385606	1	595	Zm00001d004169
7.143	0.002	Biological Process	GO:0046130	purine ribonucleoside catabolic process	0.204703	0.676014	1	638	Zm00001d017026
7.143	0.002	Biological Process	GO:0044092	negative regulation of molecular function	0.205854	0.676014	1	642	Zm00001d000184
7.143	0.002	Biological Process	GO:0006152	purine nucleoside catabolic process	0.206428	0.676014	1	644	Zm00001d017026
7.143	0.002	Biological Process	GO:0042454	ribonucleoside catabolic process	0.206428	0.676014	1	644	Zm00001d017026
7.143	0.002	Biological Process	GO:0048831	regulation of shoot system development	0.206428	0.676014	1	644	Zm00001d004169
21.429	0.001	Biological Process	GO:0009719	response to endogenous stimulus	0.206783	0.676014	3	4463	Zm00001d000184;Zm00001d031522;Zm00001d036024
7.143	0.002	Biological Process	GO:0009250	glucan biosynthetic process	0.20815	0.676014	1	650	Zm00001d041972
7.143	0.002	Biological Process	GO:0009164	nucleoside catabolic process	0.211012	0.676014	1	660	Zm00001d017026
7.143	0.002	Biological Process	GO:0051049	regulation of transport	0.211869	0.676014	1	663	Zm00001d017026
7.143	0.002	Molecular Function	GO:0003682	chromatin binding	0.212156	0.407671	1	632	Zm00001d000184
7.143	0.001	Biological Process	GO:1901658	glycosyl compound catabolic process	0.218692	0.676014	1	687	Zm00001d017026
7.143	0.001	Biological Process	GO:0006457	protein folding	0.220107	0.676014	1	692	Zm00001d028408
14.286	0.001	Biological Process	GO:0042592	homeostatic process	0.22117	0.676014	2	2491	Zm00001d000184;Zm00001d027998
21.429	0.001	Molecular Function	GO:0046914	transition metal ion binding	0.22284	0.419968	3	4407	Zm00001d000184;Zm00001d004169;Zm00001d027611
14.286	0.001	Cellular Component	GO:0044434	chloroplast part	0.223052	0.408633	2	2339	Zm00001d028408;Zm00001d036024
14.286	0.001	Cellular Component	GO:0044435	plastid part	0.229082	0.408633	2	2381	Zm00001d028408;Zm00001d036024
28.571	0.001	Biological Process	GO:0007165	signal transduction	0.229222	0.676014	4	7006	Zm00001d005752;Zm00001d017026;Zm00001d031522;Zm00001d036024
7.143	0.001	Biological Process	GO:0018205	peptidyl-lysine modification	0.232174	0.676014	1	735	Zm00001d037052
7.143	0.001	Biological Process	GO:0009657	plastid organization	0.232453	0.676014	1	736	Zm00001d028408
7.143	0.001	Biological Process	GO:0006470	protein dephosphorylation	0.233288	0.676014	1	739	Zm00001d005752
7.143	0.001	Biological Process	GO:0072593	reactive oxygen species metabolic process	0.2344	0.676014	1	743	Zm00001d004169
7.143	0.001	Biological Process	GO:0040008	regulation of growth	0.23911	0.676014	1	760	Zm00001d000184
7.143	0.001	Biological Process	GO:0072523	purine-containing compound catabolic process	0.239939	0.676014	1	763	Zm00001d017026
7.143	0.001	Molecular Function	GO:0008194	UDP-glycosyltransferase activity	0.240163	0.432346	1	727	Zm00001d041972
7.143	0.001	Biological Process	GO:0000302	response to reactive oxygen species	0.240491	0.676014	1	765	Zm00001d028408
7.143	0.001	Biological Process	GO:0032879	regulation of localization	0.240766	0.676014	1	766	Zm00001d017026
21.429	0.001	Biological Process	GO:0048513	animal organ development	0.242453	0.676014	3	4830	Zm00001d000184;Zm00001d004169;Zm00001d031522
7.143	0.001	Molecular Function	GO:0016705	oxidoreductase activity, acting on paired donors, with incorporation or reduction of molecular oxygen	0.242479	0.432346	1	735	Zm00001d021873
14.286	0.001	Biological Process	GO:0048367	shoot system development	0.242543	0.676014	2	2650	Zm00001d000184;Zm00001d004169
28.571	0.001	Biological Process	GO:0044700	single organism signaling	0.243861	0.676014	4	7185	Zm00001d005752;Zm00001d017026;Zm00001d031522;Zm00001d036024
7.143	0.001	Cellular Component	GO:0000139	Golgi membrane	0.244829	0.425229	1	729	Zm00001d041972
28.571	0.001	Molecular Function	GO:0046872	metal ion binding	0.244836	0.432346	4	6850	Zm00001d000184;Zm00001d004169;Zm00001d005752;Zm00001d027611
7.143	0.001	Biological Process	GO:1903047	mitotic cell cycle process	0.24544	0.676014	1	783	Zm00001d041972
7.143	0.001	Biological Process	GO:1901136	carbohydrate derivative catabolic process	0.246262	0.676014	1	786	Zm00001d017026
7.143	0.001	Biological Process	GO:0048585	negative regulation of response to stimulus	0.24845	0.676014	1	794	Zm00001d000184
7.143	0.001	Biological Process	GO:0042546	cell wall biogenesis	0.248723	0.676014	1	795	Zm00001d041972
7.143	0.001	Molecular Function	GO:0050662	coenzyme binding	0.249101	0.432346	1	758	Zm00001d021873
64.286	0	Biological Process	GO:0009058	biosynthetic process	0.251291	0.676014	9	20332	Zm00001d000184;Zm00001d004169;Zm00001d005752;Zm00001d018192;Zm00001d021873;Zm00001d027998;Zm00001d028408;Zm00001d031522;Zm00001d041972
28.571	0.001	Molecular Function	GO:0043169	cation binding	0.251467	0.432346	4	6926	Zm00001d000184;Zm00001d004169;Zm00001d005752;Zm00001d027611
7.143	0.001	Biological Process	GO:0050801	ion homeostasis	0.251993	0.676014	1	807	Zm00001d027998
7.143	0.001	Biological Process	GO:0009723	response to ethylene	0.253351	0.676014	1	812	Zm00001d000184
14.286	0.001	Biological Process	GO:0099402	plant organ development	0.25852	0.676014	2	2768	Zm00001d000184;Zm00001d004169
21.429	0.001	Cellular Component	GO:0012505	endomembrane system	0.262395	0.444053	3	4696	Zm00001d004169;Zm00001d017026;Zm00001d041972
7.143	0.001	Molecular Function	GO:0016747	transferase activity, transferring acyl groups other than amino-acyl groups	0.26528	0.448232	1	815	Zm00001d004169
7.143	0.001	Biological Process	GO:0048193	Golgi vesicle transport	0.266277	0.676014	1	860	Zm00001d017026
92.857	0	Biological Process	GO:0071704	organic substance metabolic process	0.266762	0.676014	13	32420	Zm00001d000184;Zm00001d004169;Zm00001d005752;Zm00001d017026;Zm00001d018192;Zm00001d021873;Zm00001d027611;Zm00001d027998;Zm00001d028237;Zm00001d028408;Zm00001d031522;Zm00001d037052;Zm00001d041972
14.286	0.001	Biological Process	GO:0071310	cellular response to organic substance	0.271974	0.676014	2	2867	Zm00001d031522;Zm00001d036024
21.429	0.001	Molecular Function	GO:0005515	protein binding	0.274091	0.45527	3	4897	Zm00001d028237;Zm00001d028408;Zm00001d031522
7.143	0.001	Biological Process	GO:0009751	response to salicylic acid	0.275834	0.676014	1	896	Zm00001d000184
7.143	0.001	Biological Process	GO:0009753	response to jasmonic acid	0.28057	0.676014	1	914	Zm00001d000184
7.143	0.001	Biological Process	GO:0006644	phospholipid metabolic process	0.282926	0.676014	1	923	Zm00001d005752
28.571	0.001	Biological Process	GO:0006351	transcription, DNA-templated	0.28936	0.676014	4	7722	Zm00001d000184;Zm00001d027998;Zm00001d028408;Zm00001d031522
7.143	0.001	Biological Process	GO:0072594	establishment of protein localization to organelle	0.291507	0.676014	1	956	Zm00001d017026
28.571	0.001	Biological Process	GO:0097659	nucleic acid-templated transcription	0.293004	0.676014	4	7764	Zm00001d000184;Zm00001d027998;Zm00001d028408;Zm00001d031522
7.143	0.001	Biological Process	GO:0006073	cellular glucan metabolic process	0.29383	0.676014	1	965	Zm00001d041972
7.143	0.001	Biological Process	GO:0045892	negative regulation of transcription, DNA-templated	0.294603	0.676014	1	968	Zm00001d000184
42.857	0	Biological Process	GO:0034645	cellular macromolecule biosynthetic process	0.294771	0.676014	6	12897	Zm00001d000184;Zm00001d004169;Zm00001d027998;Zm00001d028408;Zm00001d031522;Zm00001d041972
7.143	0.001	Molecular Function	GO:0004519	endonuclease activity	0.295862	0.482573	1	926	Zm00001d027611
7.143	0.001	Biological Process	GO:0019725	cellular homeostasis	0.2982	0.676014	1	982	Zm00001d027998
7.143	0.001	Biological Process	GO:0033692	cellular polysaccharide biosynthetic process	0.299225	0.676014	1	986	Zm00001d041972
7.143	0.001	Biological Process	GO:0044042	glucan metabolic process	0.299992	0.676014	1	989	Zm00001d041972
7.143	0.001	Biological Process	GO:0071669	plant-type cell wall organization or biogenesis	0.302545	0.676014	1	999	Zm00001d041972
35.714	0	Biological Process	GO:0031323	regulation of cellular metabolic process	0.303549	0.676014	5	10419	Zm00001d000184;Zm00001d004169;Zm00001d021873;Zm00001d028408;Zm00001d031522
28.571	0.001	Biological Process	GO:0032774	RNA biosynthetic process	0.304174	0.676014	4	7892	Zm00001d000184;Zm00001d027998;Zm00001d028408;Zm00001d031522
7.143	0.001	Molecular Function	GO:0004842	ubiquitin-protein transferase activity	0.304456	0.482573	1	958	Zm00001d037052
7.143	0.001	Biological Process	GO:1902679	negative regulation of RNA biosynthetic process	0.307117	0.676014	1	1017	Zm00001d000184
7.143	0.001	Biological Process	GO:1903507	negative regulation of nucleic acid-templated transcription	0.307117	0.676014	1	1017	Zm00001d000184
28.571	0.001	Biological Process	GO:0007154	cell communication	0.307596	0.676014	4	7931	Zm00001d005752;Zm00001d017026;Zm00001d031522;Zm00001d036024
7.143	0.001	Molecular Function	GO:0019787	ubiquitin-like protein transferase activity	0.308982	0.482573	1	975	Zm00001d037052
35.714	0	Biological Process	GO:0043412	macromolecule modification	0.311753	0.676014	5	10523	Zm00001d004169;Zm00001d005752;Zm00001d018192;Zm00001d027611;Zm00001d037052
7.143	0.001	Biological Process	GO:0033365	protein localization to organelle	0.315429	0.676014	1	1050	Zm00001d017026
7.143	0.001	Molecular Function	GO:0016758	transferase activity, transferring hexosyl groups	0.317428	0.482573	1	1007	Zm00001d041972
7.143	0.001	Biological Process	GO:0051301	cell division	0.317429	0.676014	1	1058	Zm00001d041972
14.286	0.001	Molecular Function	GO:0003723	RNA binding	0.320071	0.482573	2	3065	Zm00001d018192;Zm00001d027611
57.143	0	Biological Process	GO:0044249	cellular biosynthetic process	0.322089	0.676014	8	18650	Zm00001d000184;Zm00001d004169;Zm00001d018192;Zm00001d021873;Zm00001d027998;Zm00001d028408;Zm00001d031522;Zm00001d041972
14.286	0.001	Molecular Function	GO:0016788	hydrolase activity, acting on ester bonds	0.323641	0.482573	2	3090	Zm00001d005752;Zm00001d027611
7.143	0.001	Biological Process	GO:0034637	cellular carbohydrate biosynthetic process	0.323647	0.676014	1	1083	Zm00001d041972
7.143	0.001	Molecular Function	GO:0048037	cofactor binding	0.324998	0.482573	1	1036	Zm00001d021873
7.143	0.001	Biological Process	GO:0000278	mitotic cell cycle	0.325132	0.676014	1	1089	Zm00001d041972
7.143	0.001	Biological Process	GO:0016311	dephosphorylation	0.325873	0.676014	1	1092	Zm00001d005752
7.143	0.001	Biological Process	GO:0018193	peptidyl-amino acid modification	0.326613	0.676014	1	1095	Zm00001d037052
7.143	0.001	Biological Process	GO:0051253	negative regulation of RNA metabolic process	0.327106	0.676014	1	1097	Zm00001d000184
35.714	0	Biological Process	GO:0051716	cellular response to stimulus	0.327608	0.676014	5	10722	Zm00001d005752;Zm00001d017026;Zm00001d028237;Zm00001d031522;Zm00001d036024
14.286	0.001	Biological Process	GO:0019637	organophosphate metabolic process	0.329828	0.676014	2	3292	Zm00001d005752;Zm00001d017026
7.143	0.001	Biological Process	GO:0048569	post-embryonic organ development	0.330058	0.676014	1	1109	Zm00001d000184
7.143	0.001	Molecular Function	GO:0016746	transferase activity, transferring acyl groups	0.33069	0.483695	1	1058	Zm00001d004169
7.143	0.001	Biological Process	GO:0043623	cellular protein complex assembly	0.344637	0.676014	1	1169	Zm00001d018192
7.143	0.001	Biological Process	GO:0009205	purine ribonucleoside triphosphate metabolic process	0.345838	0.676014	1	1174	Zm00001d017026
7.143	0.001	Biological Process	GO:0000271	polysaccharide biosynthetic process	0.346078	0.676014	1	1175	Zm00001d041972
7.143	0.001	Biological Process	GO:0034655	nucleobase-containing compound catabolic process	0.346318	0.676014	1	1176	Zm00001d017026
7.143	0.001	Biological Process	GO:0009144	purine nucleoside triphosphate metabolic process	0.347038	0.676014	1	1179	Zm00001d017026
28.571	0	Biological Process	GO:0023052	signaling	0.347491	0.676014	4	8380	Zm00001d005752;Zm00001d017026;Zm00001d031522;Zm00001d036024
7.143	0.001	Biological Process	GO:0009199	ribonucleoside triphosphate metabolic process	0.34967	0.676014	1	1190	Zm00001d017026
7.143	0.001	Biological Process	GO:0009141	nucleoside triphosphate metabolic process	0.354903	0.676014	1	1212	Zm00001d017026
7.143	0.001	Cellular Component	GO:0009941	chloroplast envelope	0.354996	0.585743	1	1132	Zm00001d036024
7.143	0.001	Biological Process	GO:2000113	negative regulation of cellular macromolecule biosynthetic process	0.35514	0.676014	1	1213	Zm00001d000184
7.143	0.001	Biological Process	GO:0006357	regulation of transcription from RNA polymerase II promoter	0.358685	0.676014	1	1228	Zm00001d000184
7.143	0.001	Biological Process	GO:0016071	mRNA metabolic process	0.360333	0.676014	1	1235	Zm00001d027611
7.143	0.001	Molecular Function	GO:0004518	nuclease activity	0.361697	0.521269	1	1181	Zm00001d027611
21.429	0.001	Biological Process	GO:0010033	response to organic substance	0.361962	0.676014	3	5993	Zm00001d000184;Zm00001d031522;Zm00001d036024
7.143	0.001	Cellular Component	GO:0009526	plastid envelope	0.364574	0.586875	1	1170	Zm00001d036024
7.143	0.001	Biological Process	GO:0045934	negative regulation of nucleobase-containing compound metabolic process	0.369676	0.676014	1	1275	Zm00001d000184
7.143	0.001	Biological Process	GO:0006091	generation of precursor metabolites and energy	0.370371	0.676014	1	1278	Zm00001d018192
78.571	0	Biological Process	GO:0065007	biological regulation	0.372596	0.676014	11	27749	Zm00001d000184;Zm00001d004169;Zm00001d005752;Zm00001d017026;Zm00001d018192;Zm00001d021873;Zm00001d027998;Zm00001d028237;Zm00001d028408;Zm00001d031522;Zm00001d036024
50	0	Biological Process	GO:0032502	developmental process	0.373266	0.676014	7	16637	Zm00001d000184;Zm00001d004169;Zm00001d005752;Zm00001d017026;Zm00001d027998;Zm00001d028237;Zm00001d031522
7.143	0.001	Biological Process	GO:0006979	response to oxidative stress	0.373377	0.676014	1	1291	Zm00001d028408
14.286	0.001	Biological Process	GO:0070887	cellular response to chemical stimulus	0.373654	0.676014	2	3617	Zm00001d031522;Zm00001d036024
7.143	0.001	Biological Process	GO:0046128	purine ribonucleoside metabolic process	0.37499	0.676014	1	1298	Zm00001d017026
7.143	0.001	Biological Process	GO:0042278	purine nucleoside metabolic process	0.376369	0.676014	1	1304	Zm00001d017026
7.143	0.001	Biological Process	GO:0044264	cellular polysaccharide metabolic process	0.378891	0.676014	1	1315	Zm00001d041972
7.143	0.001	Biological Process	GO:0009451	RNA modification	0.380262	0.676014	1	1321	Zm00001d027611
28.571	0	Biological Process	GO:0034654	nucleobase-containing compound biosynthetic process	0.381493	0.676014	4	8757	Zm00001d000184;Zm00001d027998;Zm00001d028408;Zm00001d031522
7.143	0.001	Molecular Function	GO:0044877	macromolecular complex binding	0.382339	0.538617	1	1266	Zm00001d000184
7.143	0.001	Biological Process	GO:0006511	ubiquitin-dependent protein catabolic process	0.38436	0.676014	1	1339	Zm00001d037052
7.143	0.001	Molecular Function	GO:0016874	ligase activity	0.384726	0.538617	1	1276	Zm00001d037052
42.857	0	Biological Process	GO:0016043	cellular component organization	0.386972	0.676014	6	14119	Zm00001d000184;Zm00001d017026;Zm00001d018192;Zm00001d028237;Zm00001d028408;Zm00001d041972
7.143	0.001	Biological Process	GO:0009119	ribonucleoside metabolic process	0.38753	0.676014	1	1353	Zm00001d017026
7.143	0.001	Biological Process	GO:0019941	modification-dependent protein catabolic process	0.387981	0.676014	1	1355	Zm00001d037052
7.143	0.001	Biological Process	GO:0048364	root development	0.390234	0.676014	1	1365	Zm00001d000184
7.143	0.001	Biological Process	GO:0022622	root system development	0.391358	0.676014	1	1370	Zm00001d000184
57.143	0	Biological Process	GO:0050794	regulation of cellular process	0.392041	0.676014	8	19619	Zm00001d000184;Zm00001d004169;Zm00001d005752;Zm00001d017026;Zm00001d021873;Zm00001d028408;Zm00001d031522;Zm00001d036024
28.571	0	Biological Process	GO:0006464	cellular protein modification process	0.395454	0.676014	4	8911	Zm00001d004169;Zm00001d005752;Zm00001d018192;Zm00001d037052
28.571	0	Biological Process	GO:0036211	protein modification process	0.395454	0.676014	4	8911	Zm00001d004169;Zm00001d005752;Zm00001d018192;Zm00001d037052
7.143	0.001	Biological Process	GO:0009743	response to carbohydrate	0.39628	0.676014	1	1392	Zm00001d000184
57.143	0	Biological Process	GO:0044710	single-organism metabolic process	0.39629	0.676014	8	19676	Zm00001d005752;Zm00001d017026;Zm00001d018192;Zm00001d021873;Zm00001d028237;Zm00001d031522;Zm00001d036024;Zm00001d041972
7.143	0.001	Biological Process	GO:0043632	modification-dependent macromolecule catabolic process	0.396502	0.676014	1	1393	Zm00001d037052
7.143	0.001	Cellular Component	GO:0009570	chloroplast stroma	0.399683	0.618378	1	1314	Zm00001d028408
100	0	Biological Process	GO:0008152	metabolic process	0.401508	0.676014	14	36843	Zm00001d000184;Zm00001d004169;Zm00001d005752;Zm00001d017026;Zm00001d018192;Zm00001d021873;Zm00001d027611;Zm00001d027998;Zm00001d028237;Zm00001d028408;Zm00001d031522;Zm00001d036024;Zm00001d037052;Zm00001d041972
7.143	0.001	Biological Process	GO:0010558	negative regulation of macromolecule biosynthetic process	0.403593	0.676014	1	1425	Zm00001d000184
7.143	0.001	Cellular Component	GO:0009532	plastid stroma	0.404886	0.618378	1	1336	Zm00001d028408
21.429	0	Biological Process	GO:0009056	catabolic process	0.405029	0.676014	3	6405	Zm00001d017026;Zm00001d018192;Zm00001d037052
7.143	0.001	Biological Process	GO:0000902	cell morphogenesis	0.405792	0.676014	1	1435	Zm00001d017026
7.143	0.001	Biological Process	GO:0090305	nucleic acid phosphodiester bond hydrolysis	0.406231	0.676014	1	1437	Zm00001d027611
7.143	0.001	Biological Process	GO:0031327	negative regulation of cellular biosynthetic process	0.406451	0.676014	1	1438	Zm00001d000184
7.143	0.001	Biological Process	GO:1901565	organonitrogen compound catabolic process	0.408203	0.676014	1	1446	Zm00001d017026
7.143	0.001	Biological Process	GO:0071555	cell wall organization	0.410605	0.676014	1	1457	Zm00001d041972
7.143	0.001	Biological Process	GO:0046700	heterocycle catabolic process	0.413866	0.676014	1	1472	Zm00001d017026
7.143	0.001	Biological Process	GO:0009150	purine ribonucleotide metabolic process	0.414083	0.676014	1	1473	Zm00001d017026
7.143	0.001	Biological Process	GO:0044270	cellular nitrogen compound catabolic process	0.414516	0.676014	1	1475	Zm00001d017026
7.143	0.001	Cellular Component	GO:1990234	transferase complex	0.414702	0.618378	1	1378	Zm00001d028408
64.286	0	Biological Process	GO:0050896	response to stimulus	0.416637	0.676014	9	22704	Zm00001d000184;Zm00001d005752;Zm00001d017026;Zm00001d027998;Zm00001d028237;Zm00001d028408;Zm00001d031522;Zm00001d036024;Zm00001d041972
7.143	0.001	Biological Process	GO:2000026	regulation of multicellular organismal development	0.417541	0.676014	1	1489	Zm00001d004169
35.714	0	Biological Process	GO:0016070	RNA metabolic process	0.420606	0.676014	5	11855	Zm00001d000184;Zm00001d027611;Zm00001d027998;Zm00001d028408;Zm00001d031522
7.143	0.001	Cellular Component	GO:0031984	organelle subcompartment	0.421621	0.618378	1	1408	Zm00001d004169
7.143	0.001	Biological Process	GO:0009737	response to abscisic acid	0.424188	0.676014	1	1520	Zm00001d000184
7.143	0.001	Biological Process	GO:0019439	aromatic compound catabolic process	0.424188	0.676014	1	1520	Zm00001d017026
71.429	0	Molecular Function	GO:0003824	catalytic activity	0.424293	0.585644	10	24348	Zm00001d004169;Zm00001d005752;Zm00001d017026;Zm00001d021873;Zm00001d027611;Zm00001d027998;Zm00001d028408;Zm00001d036024;Zm00001d037052;Zm00001d041972
21.429	0	Biological Process	GO:0006355	regulation of transcription, DNA-templated	0.424372	0.676014	3	6591	Zm00001d000184;Zm00001d028408;Zm00001d031522
7.143	0.001	Biological Process	GO:0016567	protein ubiquitination	0.425254	0.676014	1	1525	Zm00001d037052
7.143	0.001	Biological Process	GO:0045229	external encapsulating structure organization	0.426742	0.676014	1	1532	Zm00001d041972
7.143	0.001	Biological Process	GO:1901361	organic cyclic compound catabolic process	0.426955	0.676014	1	1533	Zm00001d017026
7.143	0.001	Biological Process	GO:0061024	membrane organization	0.428439	0.676014	1	1540	Zm00001d017026
21.429	0	Biological Process	GO:1903506	regulation of nucleic acid-templated transcription	0.429554	0.676014	3	6641	Zm00001d000184;Zm00001d028408;Zm00001d031522
7.143	0.001	Biological Process	GO:0009116	nucleoside metabolic process	0.429709	0.676014	1	1546	Zm00001d017026
21.429	0	Biological Process	GO:2001141	regulation of RNA biosynthetic process	0.429761	0.676014	3	6643	Zm00001d000184;Zm00001d028408;Zm00001d031522
7.143	0.001	Biological Process	GO:0032989	cellular component morphogenesis	0.42992	0.676014	1	1547	Zm00001d017026
28.571	0	Biological Process	GO:0042221	response to chemical	0.430213	0.676014	4	9294	Zm00001d000184;Zm00001d028408;Zm00001d031522;Zm00001d036024
7.143	0.001	Biological Process	GO:0010629	negative regulation of gene expression	0.431608	0.676014	1	1555	Zm00001d000184
35.714	0	Biological Process	GO:0006950	response to stress	0.433271	0.676014	5	12007	Zm00001d000184;Zm00001d027998;Zm00001d028237;Zm00001d028408;Zm00001d036024
7.143	0.001	Molecular Function	GO:0016757	transferase activity, transferring glycosyl groups	0.433365	0.589858	1	1488	Zm00001d041972
7.143	0.001	Biological Process	GO:0051603	proteolysis involved in cellular protein catabolic process	0.434342	0.676014	1	1568	Zm00001d037052
7.143	0.001	Biological Process	GO:0009890	negative regulation of biosynthetic process	0.436645	0.676014	1	1579	Zm00001d000184
7.143	0.001	Biological Process	GO:0006461	protein complex assembly	0.439564	0.676014	1	1593	Zm00001d018192
7.143	0.001	Biological Process	GO:0006605	protein targeting	0.439979	0.676014	1	1595	Zm00001d017026
7.143	0.001	Biological Process	GO:0051172	negative regulation of nitrogen compound metabolic process	0.440395	0.676014	1	1597	Zm00001d000184
7.143	0.001	Biological Process	GO:0070271	protein complex biogenesis	0.44164	0.676014	1	1603	Zm00001d018192
7.143	0.001	Biological Process	GO:0016482	cytoplasmic transport	0.442261	0.676014	1	1606	Zm00001d017026
7.143	0.001	Biological Process	GO:0016051	carbohydrate biosynthetic process	0.445153	0.676014	1	1620	Zm00001d041972
28.571	0	Biological Process	GO:0018130	heterocycle biosynthetic process	0.445341	0.676014	4	9461	Zm00001d000184;Zm00001d027998;Zm00001d028408;Zm00001d031522
7.143	0.001	Biological Process	GO:0006163	purine nucleotide metabolic process	0.445359	0.676014	1	1621	Zm00001d017026
7.143	0.001	Molecular Function	GO:0046983	protein dimerization activity	0.4469	0.599948	1	1550	Zm00001d031522
14.286	0	Biological Process	GO:0044085	cellular component biogenesis	0.447144	0.676014	2	4178	Zm00001d018192;Zm00001d041972
7.143	0.001	Biological Process	GO:0044257	cellular protein catabolic process	0.447415	0.676014	1	1631	Zm00001d037052
50	0	Biological Process	GO:1901576	organic substance biosynthetic process	0.44779	0.676014	7	17617	Zm00001d000184;Zm00001d004169;Zm00001d005752;Zm00001d027998;Zm00001d028408;Zm00001d031522;Zm00001d041972
21.429	0	Biological Process	GO:0051252	regulation of RNA metabolic process	0.449564	0.676014	3	6835	Zm00001d000184;Zm00001d028408;Zm00001d031522
7.143	0.001	Biological Process	GO:0009259	ribonucleotide metabolic process	0.453339	0.676014	1	1660	Zm00001d017026
42.857	0	Biological Process	GO:0071840	cellular component organization or biogenesis	0.455428	0.676014	6	14988	Zm00001d000184;Zm00001d017026;Zm00001d018192;Zm00001d028237;Zm00001d028408;Zm00001d041972
14.286	0	Biological Process	GO:0009791	post-embryonic development	0.456816	0.676014	2	4254	Zm00001d000184;Zm00001d031522
7.143	0.001	Biological Process	GO:0072521	purine-containing compound metabolic process	0.458599	0.676014	1	1686	Zm00001d017026
7.143	0.001	Biological Process	GO:0005976	polysaccharide metabolic process	0.460007	0.676014	1	1693	Zm00001d041972
7.143	0.001	Biological Process	GO:1902580	single-organism cellular localization	0.460409	0.676014	1	1695	Zm00001d017026
7.143	0.001	Biological Process	GO:0032446	protein modification by small protein conjugation	0.461613	0.676014	1	1701	Zm00001d037052
50	0	Biological Process	GO:0006139	nucleobase-containing compound metabolic process	0.461696	0.676014	7	17797	Zm00001d000184;Zm00001d017026;Zm00001d027611;Zm00001d027998;Zm00001d028237;Zm00001d028408;Zm00001d031522
7.143	0.001	Biological Process	GO:0014070	response to organic cyclic compound	0.462814	0.676014	1	1707	Zm00001d000184
7.143	0.001	Biological Process	GO:0009651	response to salt stress	0.463014	0.676014	1	1708	Zm00001d000184
35.714	0	Biological Process	GO:0019222	regulation of metabolic process	0.463023	0.676014	5	12364	Zm00001d000184;Zm00001d004169;Zm00001d021873;Zm00001d028408;Zm00001d031522
42.857	0	Biological Process	GO:0090304	nucleic acid metabolic process	0.468833	0.679175	6	15157	Zm00001d000184;Zm00001d027611;Zm00001d027998;Zm00001d028237;Zm00001d028408;Zm00001d031522
21.429	0	Biological Process	GO:2000112	regulation of cellular macromolecule biosynthetic process	0.470922	0.679175	3	7044	Zm00001d000184;Zm00001d028408;Zm00001d031522
7.143	0.001	Biological Process	GO:0050790	regulation of catalytic activity	0.474688	0.679175	1	1767	Zm00001d000184
7.143	0.001	Biological Process	GO:0034622	cellular macromolecular complex assembly	0.480533	0.679175	1	1797	Zm00001d018192
7.143	0.001	Biological Process	GO:0030163	protein catabolic process	0.482081	0.679175	1	1805	Zm00001d037052
28.571	0	Biological Process	GO:0019438	aromatic compound biosynthetic process	0.482432	0.679175	4	9873	Zm00001d000184;Zm00001d027998;Zm00001d028408;Zm00001d031522
64.286	0	Biological Process	GO:0050789	regulation of biological process	0.482743	0.679175	9	23555	Zm00001d000184;Zm00001d004169;Zm00001d005752;Zm00001d017026;Zm00001d018192;Zm00001d021873;Zm00001d028408;Zm00001d031522;Zm00001d036024
7.143	0.001	Biological Process	GO:0051239	regulation of multicellular organismal process	0.486509	0.679175	1	1828	Zm00001d004169
7.143	0.001	Biological Process	GO:0097305	response to alcohol	0.487084	0.679175	1	1831	Zm00001d000184
14.286	0	Biological Process	GO:0065008	regulation of biological quality	0.488678	0.679175	2	4509	Zm00001d000184;Zm00001d027998
7.143	0.001	Biological Process	GO:0006281	DNA repair	0.488806	0.679175	1	1840	Zm00001d028237
7.143	0.001	Biological Process	GO:0009266	response to temperature stimulus	0.488806	0.679175	1	1840	Zm00001d028408
7.143	0.001	Biological Process	GO:0006970	response to osmotic stress	0.489378	0.679175	1	1843	Zm00001d000184
21.429	0	Molecular Function	GO:0043168	anion binding	0.493136	0.653073	3	6914	Zm00001d017026;Zm00001d021873;Zm00001d037052
7.143	0.001	Biological Process	GO:0006366	transcription from RNA polymerase II promoter	0.496203	0.682684	1	1879	Zm00001d000184
7.143	0.001	Biological Process	GO:0019693	ribose phosphate metabolic process	0.500706	0.682684	1	1903	Zm00001d017026
7.143	0.001	Biological Process	GO:0071822	protein complex subunit organization	0.500706	0.682684	1	1903	Zm00001d018192
64.286	0	Biological Process	GO:0044763	single-organism cellular process	0.50145	0.682684	9	23792	Zm00001d000184;Zm00001d005752;Zm00001d017026;Zm00001d018192;Zm00001d027998;Zm00001d028237;Zm00001d031522;Zm00001d036024;Zm00001d041972
7.143	0.001	Biological Process	GO:0044262	cellular carbohydrate metabolic process	0.501825	0.682684	1	1909	Zm00001d041972
7.143	0.001	Biological Process	GO:0050793	regulation of developmental process	0.503129	0.682684	1	1916	Zm00001d004169
21.429	0	Biological Process	GO:0010556	regulation of macromolecule biosynthetic process	0.507095	0.683345	3	7404	Zm00001d000184;Zm00001d028408;Zm00001d031522
7.143	0.001	Molecular Function	GO:0003700	transcription factor activity, sequence-specific DNA binding	0.508252	0.656126	1	1850	Zm00001d000184
7.143	0.001	Molecular Function	GO:0001071	nucleic acid binding transcription factor activity	0.508833	0.656126	1	1853	Zm00001d000184
7.143	0.001	Biological Process	GO:1901657	glycosyl compound metabolic process	0.509783	0.683345	1	1952	Zm00001d017026
7.143	0.001	Biological Process	GO:0022402	cell cycle process	0.512531	0.683345	1	1967	Zm00001d041972
14.286	0	Biological Process	GO:0051641	cellular localization	0.512865	0.683345	2	4708	Zm00001d017026;Zm00001d028237
28.571	0	Biological Process	GO:1901362	organic cyclic compound biosynthetic process	0.520652	0.683345	4	10304	Zm00001d000184;Zm00001d027998;Zm00001d028408;Zm00001d031522
14.286	0	Biological Process	GO:1901700	response to oxygen-containing compound	0.521699	0.683345	2	4782	Zm00001d000184;Zm00001d028408
7.143	0	Biological Process	GO:0016192	vesicle-mediated transport	0.521767	0.683345	1	2018	Zm00001d017026
7.143	0	Biological Process	GO:0065009	regulation of molecular function	0.522484	0.683345	1	2022	Zm00001d000184
7.143	0	Biological Process	GO:0031324	negative regulation of cellular metabolic process	0.523201	0.683345	1	2026	Zm00001d000184
7.143	0	Biological Process	GO:0006886	intracellular protein transport	0.525523	0.683345	1	2039	Zm00001d017026
50	0	Biological Process	GO:0046483	heterocycle metabolic process	0.525968	0.683345	7	18627	Zm00001d000184;Zm00001d017026;Zm00001d027611;Zm00001d027998;Zm00001d028237;Zm00001d028408;Zm00001d031522
14.286	0	Biological Process	GO:0044248	cellular catabolic process	0.526082	0.683345	2	4819	Zm00001d017026;Zm00001d037052
7.143	0.001	Cellular Component	GO:1902494	catalytic complex	0.526895	0.755979	1	1911	Zm00001d028408
7.143	0	Biological Process	GO:0033993	response to lipid	0.530488	0.686624	1	2067	Zm00001d000184
7.143	0	Biological Process	GO:0006974	cellular response to DNA damage stimulus	0.532776	0.68715	1	2080	Zm00001d028237
7.143	0	Biological Process	GO:0065003	macromolecular complex assembly	0.535055	0.687659	1	2093	Zm00001d018192
7.143	0	Biological Process	GO:0044265	cellular macromolecule catabolic process	0.537845	0.688819	1	2109	Zm00001d037052
21.429	0	Biological Process	GO:0019219	regulation of nucleobase-containing compound metabolic process	0.542409	0.692235	3	7765	Zm00001d000184;Zm00001d028408;Zm00001d031522
21.429	0	Biological Process	GO:0031326	regulation of cellular biosynthetic process	0.547598	0.695883	3	7819	Zm00001d000184;Zm00001d028408;Zm00001d031522
7.143	0	Cellular Component	GO:0005783	endoplasmic reticulum	0.54923	0.767743	1	2031	Zm00001d041972
21.429	0	Biological Process	GO:0010468	regulation of gene expression	0.549321	0.695883	3	7837	Zm00001d000184;Zm00001d028408;Zm00001d031522
7.143	0	Biological Process	GO:0034613	cellular protein localization	0.556107	0.695883	1	2216	Zm00001d017026
7.143	0	Biological Process	GO:0010605	negative regulation of macromolecule metabolic process	0.557278	0.695883	1	2223	Zm00001d000184
7.143	0	Biological Process	GO:0035556	intracellular signal transduction	0.557779	0.695883	1	2226	Zm00001d017026
21.429	0	Biological Process	GO:0048731	system development	0.558085	0.695883	3	7929	Zm00001d000184;Zm00001d004169;Zm00001d031522
35.714	0	Cellular Component	GO:0005634	nucleus	0.558359	0.767743	5	12629	Zm00001d000184;Zm00001d027998;Zm00001d028237;Zm00001d031522;Zm00001d037052
7.143	0	Biological Process	GO:0071554	cell wall organization or biogenesis	0.558613	0.695883	1	2231	Zm00001d041972
28.571	0	Biological Process	GO:0048856	anatomical structure development	0.561245	0.696297	4	10773	Zm00001d000184;Zm00001d004169;Zm00001d017026;Zm00001d031522
7.143	0	Biological Process	GO:0070647	protein modification by small protein conjugation or removal	0.562761	0.696297	1	2256	Zm00001d037052
50	0	Biological Process	GO:0006725	cellular aromatic compound metabolic process	0.565207	0.696961	7	19138	Zm00001d000184;Zm00001d017026;Zm00001d027611;Zm00001d027998;Zm00001d028237;Zm00001d028408;Zm00001d031522
7.143	0	Biological Process	GO:0070727	cellular macromolecule localization	0.569321	0.699671	1	2296	Zm00001d017026
21.429	0	Molecular Function	GO:0000166	nucleotide binding	0.569584	0.715631	3	7663	Zm00001d017026;Zm00001d021873;Zm00001d037052
21.429	0	Molecular Function	GO:1901265	nucleoside phosphate binding	0.569584	0.715631	3	7663	Zm00001d017026;Zm00001d021873;Zm00001d037052
7.143	0	Biological Process	GO:0048583	regulation of response to stimulus	0.573698	0.702683	1	2323	Zm00001d000184
7.143	0	Cellular Component	GO:0031967	organelle envelope	0.574048	0.769703	1	2171	Zm00001d036024
14.286	0	Biological Process	GO:1901575	organic substance catabolic process	0.577962	0.705408	2	5273	Zm00001d017026;Zm00001d037052
7.143	0	Biological Process	GO:0009117	nucleotide metabolic process	0.579787	0.705408	1	2361	Zm00001d017026
7.143	0	Biological Process	GO:0006753	nucleoside phosphate metabolic process	0.582644	0.706528	1	2379	Zm00001d017026
7.143	0	Cellular Component	GO:0031975	envelope	0.583108	0.769703	1	2224	Zm00001d036024
50	0	Biological Process	GO:1901360	organic cyclic compound metabolic process	0.591496	0.712666	7	19485	Zm00001d000184;Zm00001d017026;Zm00001d027611;Zm00001d027998;Zm00001d028237;Zm00001d028408;Zm00001d031522
7.143	0	Biological Process	GO:0015031	protein transport	0.59188	0.712666	1	2438	Zm00001d017026
21.429	0	Biological Process	GO:0009889	regulation of biosynthetic process	0.594152	0.712666	3	8317	Zm00001d000184;Zm00001d028408;Zm00001d031522
21.429	0	Biological Process	GO:0051171	regulation of nitrogen compound metabolic process	0.595516	0.712666	3	8332	Zm00001d000184;Zm00001d028408;Zm00001d031522
21.429	0	Molecular Function	GO:0036094	small molecule binding	0.597949	0.735504	3	7956	Zm00001d017026;Zm00001d021873;Zm00001d037052
7.143	0	Biological Process	GO:0045184	establishment of protein localization	0.602894	0.718052	1	2510	Zm00001d017026
7.143	0	Biological Process	GO:1902582	single-organism intracellular transport	0.60395	0.718052	1	2517	Zm00001d017026
28.571	0	Cellular Component	GO:0044446	intracellular organelle part	0.60988	0.789257	4	10604	Zm00001d004169;Zm00001d028408;Zm00001d036024;Zm00001d041972
7.143	0	Biological Process	GO:0055086	nucleobase-containing small molecule metabolic process	0.6126	0.725971	1	2575	Zm00001d017026
7.143	0	Biological Process	GO:0007049	cell cycle	0.614662	0.726057	1	2589	Zm00001d041972
14.286	0	Molecular Function	GO:0035639	purine ribonucleoside triphosphate binding	0.615012	0.735504	2	5348	Zm00001d017026;Zm00001d037052
14.286	0	Biological Process	GO:0009628	response to abiotic stimulus	0.620724	0.730852	2	5674	Zm00001d000184;Zm00001d028408
28.571	0	Cellular Component	GO:0044422	organelle part	0.623341	0.791163	4	10760	Zm00001d004169;Zm00001d028408;Zm00001d036024;Zm00001d041972
21.429	0	Biological Process	GO:0044281	small molecule metabolic process	0.624302	0.731934	3	8655	Zm00001d005752;Zm00001d017026;Zm00001d018192
28.571	0	Biological Process	GO:0044271	cellular nitrogen compound biosynthetic process	0.625653	0.731934	4	11553	Zm00001d000184;Zm00001d027998;Zm00001d028408;Zm00001d031522
7.143	0	Biological Process	GO:0022607	cellular component assembly	0.628241	0.732614	1	2683	Zm00001d018192
7.143	0	Biological Process	GO:0008104	protein localization	0.634723	0.734918	1	2729	Zm00001d017026
7.143	0	Biological Process	GO:0009892	negative regulation of metabolic process	0.634863	0.734918	1	2730	Zm00001d000184
7.143	0	Biological Process	GO:0009057	macromolecule catabolic process	0.636258	0.734918	1	2740	Zm00001d037052
78.571	0	Biological Process	GO:0044699	single-organism process	0.643163	0.740551	11	30840	Zm00001d000184;Zm00001d004169;Zm00001d005752;Zm00001d017026;Zm00001d018192;Zm00001d021873;Zm00001d027998;Zm00001d028237;Zm00001d031522;Zm00001d036024;Zm00001d041972
7.143	0	Cellular Component	GO:0005576	extracellular region	0.650555	0.810125	1	2656	Zm00001d017026
14.286	0	Molecular Function	GO:0001883	purine nucleoside binding	0.654225	0.735504	2	5720	Zm00001d017026;Zm00001d037052
14.286	0	Molecular Function	GO:0032550	purine ribonucleoside binding	0.654225	0.735504	2	5720	Zm00001d017026;Zm00001d037052
14.286	0	Molecular Function	GO:0032549	ribonucleoside binding	0.655442	0.735504	2	5732	Zm00001d017026;Zm00001d037052
14.286	0	Molecular Function	GO:0001882	nucleoside binding	0.655543	0.735504	2	5733	Zm00001d017026;Zm00001d037052
14.286	0	Molecular Function	GO:0032555	purine ribonucleotide binding	0.655746	0.735504	2	5735	Zm00001d017026;Zm00001d037052
14.286	0	Molecular Function	GO:0017076	purine nucleotide binding	0.658573	0.735504	2	5763	Zm00001d017026;Zm00001d037052
14.286	0	Molecular Function	GO:0032553	ribonucleotide binding	0.66398	0.735504	2	5817	Zm00001d017026;Zm00001d037052
7.143	0	Molecular Function	GO:0017111	nucleoside-triphosphatase activity	0.664317	0.735504	1	2807	Zm00001d017026
7.143	0	Biological Process	GO:0044255	cellular lipid metabolic process	0.666232	0.7647	1	2964	Zm00001d005752
14.286	0	Cellular Component	GO:0043234	protein complex	0.673094	0.82267	2	5797	Zm00001d028408;Zm00001d037052
14.286	0	Molecular Function	GO:0097367	carbohydrate derivative binding	0.674223	0.735504	2	5921	Zm00001d017026;Zm00001d037052
7.143	0	Molecular Function	GO:0016462	pyrophosphatase activity	0.683219	0.735504	1	2950	Zm00001d017026
7.143	0	Biological Process	GO:0044723	single-organism carbohydrate metabolic process	0.685126	0.777501	1	3115	Zm00001d041972
21.429	0	Biological Process	GO:0060255	regulation of macromolecule metabolic process	0.68641	0.777501	3	9403	Zm00001d000184;Zm00001d028408;Zm00001d031522
7.143	0	Biological Process	GO:0048523	negative regulation of cellular process	0.687431	0.777501	1	3134	Zm00001d000184
7.143	0	Biological Process	GO:0048608	reproductive structure development	0.688035	0.777501	1	3139	Zm00001d031522
7.143	0	Biological Process	GO:0061458	reproductive system development	0.688035	0.777501	1	3139	Zm00001d031522
7.143	0	Molecular Function	GO:0016818	hydrolase activity, acting on acid anhydrides, in phosphorus-containing anhydrides	0.688326	0.735504	1	2990	Zm00001d017026
7.143	0	Molecular Function	GO:0016817	hydrolase activity, acting on acid anhydrides	0.690473	0.735504	1	3007	Zm00001d017026
28.571	0	Biological Process	GO:0044267	cellular protein metabolic process	0.690953	0.778389	4	12412	Zm00001d004169;Zm00001d005752;Zm00001d018192;Zm00001d037052
7.143	0	Biological Process	GO:0046907	intracellular transport	0.693899	0.779302	1	3188	Zm00001d017026
7.143	0	Biological Process	GO:0001101	response to acid chemical	0.699893	0.783623	1	3239	Zm00001d000184
21.429	0	Biological Process	GO:0080090	regulation of primary metabolic process	0.702947	0.784635	3	9617	Zm00001d000184;Zm00001d028408;Zm00001d031522
64.286	0	Cellular Component	GO:0016020	membrane	0.705927	0.833989	9	24684	Zm00001d004169;Zm00001d005752;Zm00001d017026;Zm00001d018192;Zm00001d021873;Zm00001d027998;Zm00001d036024;Zm00001d037052;Zm00001d041972
7.143	0	Cellular Component	GO:0098588	bounding membrane of organelle	0.707627	0.833989	1	3087	Zm00001d041972
7.143	0	Biological Process	GO:0048522	positive regulation of cellular process	0.723444	0.803084	1	3449	Zm00001d000184
7.143	0	Biological Process	GO:0033036	macromolecule localization	0.723876	0.803084	1	3453	Zm00001d017026
7.143	0	Biological Process	GO:0006259	DNA metabolic process	0.731956	0.80795	1	3529	Zm00001d028237
7.143	0	Biological Process	GO:0044712	single-organism catabolic process	0.732689	0.80795	1	3536	Zm00001d017026
7.143	0	Biological Process	GO:0006508	proteolysis	0.745869	0.820007	1	3665	Zm00001d037052
21.429	0	Molecular Function	GO:0016787	hydrolase activity	0.746314	0.786438	3	9725	Zm00001d005752;Zm00001d017026;Zm00001d027611
7.143	0	Cellular Component	GO:0005739	mitochondrion	0.746724	0.864628	1	3430	Zm00001d027611
7.143	0	Biological Process	GO:1901135	carbohydrate derivative metabolic process	0.74993	0.821872	1	3706	Zm00001d017026
7.143	0	Biological Process	GO:0043933	macromolecular complex subunit organization	0.753446	0.821872	1	3742	Zm00001d018192
28.571	0	Biological Process	GO:0044767	single-organism developmental process	0.755578	0.821872	4	13369	Zm00001d000184;Zm00001d004169;Zm00001d017026;Zm00001d031522
28.571	0	Biological Process	GO:0010467	gene expression	0.756895	0.821872	4	13390	Zm00001d000184;Zm00001d027998;Zm00001d028408;Zm00001d031522
7.143	0	Biological Process	GO:0071702	organic substance transport	0.758824	0.821872	1	3798	Zm00001d017026
7.143	0	Biological Process	GO:0051649	establishment of localization in cell	0.766319	0.827534	1	3878	Zm00001d017026
35.714	0	Biological Process	GO:0032501	multicellular organismal process	0.776769	0.8343	5	16636	Zm00001d000184;Zm00001d004169;Zm00001d027998;Zm00001d028237;Zm00001d031522
7.143	0	Biological Process	GO:0003006	developmental process involved in reproduction	0.777156	0.8343	1	3998	Zm00001d031522
14.286	0	Biological Process	GO:0006996	organelle organization	0.780337	0.835258	2	7536	Zm00001d028237;Zm00001d028408
7.143	0	Biological Process	GO:0006629	lipid metabolic process	0.786423	0.838846	1	4105	Zm00001d005752
28.571	0	Biological Process	GO:0019538	protein metabolic process	0.788286	0.838846	4	13914	Zm00001d004169;Zm00001d005752;Zm00001d018192;Zm00001d037052
21.429	0	Molecular Function	GO:0016740	transferase activity	0.788924	0.822495	3	10355	Zm00001d004169;Zm00001d037052;Zm00001d041972
7.143	0	Cellular Component	GO:0031090	organelle membrane	0.789781	0.879053	1	3870	Zm00001d041972
7.143	0	Biological Process	GO:0005975	carbohydrate metabolic process	0.792952	0.841359	1	4183	Zm00001d041972
42.857	0	Cellular Component	GO:0016021	integral component of membrane	0.805797	0.879053	6	18662	Zm00001d004169;Zm00001d005752;Zm00001d018192;Zm00001d021873;Zm00001d036024;Zm00001d041972
42.857	0	Cellular Component	GO:0031224	intrinsic component of membrane	0.808912	0.879053	6	18717	Zm00001d004169;Zm00001d005752;Zm00001d018192;Zm00001d021873;Zm00001d036024;Zm00001d041972
7.143	0	Biological Process	GO:0033554	cellular response to stress	0.814298	0.861504	1	4455	Zm00001d028237
7.143	0	Biological Process	GO:0006082	organic acid metabolic process	0.828184	0.872744	1	4648	Zm00001d018192
7.143	0	Biological Process	GO:0048869	cellular developmental process	0.829704	0.872744	1	4670	Zm00001d017026
7.143	0	Biological Process	GO:0048519	negative regulation of biological process	0.83345	0.873344	1	4725	Zm00001d000184
7.143	0	Biological Process	GO:0009653	anatomical structure morphogenesis	0.83506	0.873344	1	4749	Zm00001d017026
14.286	0	Cellular Component	GO:0032991	macromolecular complex	0.840791	0.879053	2	7961	Zm00001d028408;Zm00001d037052
7.143	0	Cellular Component	GO:0005829	cytosol	0.84357	0.879053	1	4556	Zm00001d036024
7.143	0	Biological Process	GO:0022414	reproductive process	0.84706	0.883362	1	4935	Zm00001d031522
14.286	0	Biological Process	GO:0006796	phosphate-containing compound metabolic process	0.851881	0.885859	2	8740	Zm00001d005752;Zm00001d017026
42.857	0	Cellular Component	GO:0044425	membrane part	0.855743	0.879053	6	19621	Zm00001d004169;Zm00001d005752;Zm00001d018192;Zm00001d021873;Zm00001d036024;Zm00001d041972
7.143	0	Molecular Function	GO:0005524	ATP binding	0.856146	0.883182	1	4840	Zm00001d037052
7.143	0	Biological Process	GO:0048518	positive regulation of biological process	0.85743	0.889096	1	5107	Zm00001d000184
14.286	0	Biological Process	GO:0006793	phosphorus metabolic process	0.862156	0.891464	2	8950	Zm00001d005752;Zm00001d017026
7.143	0	Cellular Component	GO:0043232	intracellular non-membrane-bounded organelle	0.86526	0.879053	1	4897	Zm00001d028408
7.143	0	Cellular Component	GO:0043228	non-membrane-bounded organelle	0.865734	0.879053	1	4905	Zm00001d028408
21.429	0	Biological Process	GO:0007275	multicellular organism development	0.870536	0.895067	3	12484	Zm00001d000184;Zm00001d004169;Zm00001d031522
7.143	0	Biological Process	GO:0000003	reproduction	0.870545	0.895067	1	5342	Zm00001d031522
7.143	0	Molecular Function	GO:0032559	adenyl ribonucleotide binding	0.878358	0.888212	1	5228	Zm00001d037052
7.143	0	Molecular Function	GO:0030554	adenyl nucleotide binding	0.879149	0.888212	1	5243	Zm00001d037052
21.429	0	Biological Process	GO:0044707	single-multicellular organism process	0.882527	0.90405	3	12781	Zm00001d000184;Zm00001d004169;Zm00001d031522
14.286	0	Biological Process	GO:0006810	transport	0.884235	0.90405	2	9449	Zm00001d017026;Zm00001d028237
14.286	0	Biological Process	GO:0051234	establishment of localization	0.912538	0.930381	2	10221	Zm00001d017026;Zm00001d028237
7.143	0	Biological Process	GO:0044711	single-organism biosynthetic process	0.927649	0.943105	1	6725	Zm00001d041972
7.143	0	Biological Process	GO:0044765	single-organism transport	0.930186	0.943105	1	6808	Zm00001d017026
7.143	0	Biological Process	GO:1902578	single-organism localization	0.933075	0.943414	1	6906	Zm00001d017026
7.143	0	Biological Process	GO:1901564	organonitrogen compound metabolic process	0.944804	0.952634	1	7349	Zm00001d017026
14.286	0	Biological Process	GO:0051179	localization	0.956686	0.961957	2	12021	Zm00001d017026;Zm00001d028237
100	0	Biological Process	GO:0009987	cellular process	0.985499	0.988207	14	39283	Zm00001d000184;Zm00001d004169;Zm00001d005752;Zm00001d017026;Zm00001d018192;Zm00001d021873;Zm00001d027611;Zm00001d027998;Zm00001d028237;Zm00001d028408;Zm00001d031522;Zm00001d036024;Zm00001d037052;Zm00001d041972
100	0	Molecular Function	GO:0003674	molecular_function	1	1	14	37429	Zm00001d000184;Zm00001d004169;Zm00001d005752;Zm00001d017026;Zm00001d018192;Zm00001d021873;Zm00001d027611;Zm00001d027998;Zm00001d028237;Zm00001d028408;Zm00001d031522;Zm00001d036024;Zm00001d037052;Zm00001d041972
100	0	Cellular Component	GO:0005575	cellular_component	1	1	14	36717	Zm00001d000184;Zm00001d004169;Zm00001d005752;Zm00001d017026;Zm00001d018192;Zm00001d021873;Zm00001d027611;Zm00001d027998;Zm00001d028237;Zm00001d028408;Zm00001d031522;Zm00001d036024;Zm00001d037052;Zm00001d041972
100	0	Biological Process	GO:0008150	biological_process	1	1	14	39324	Zm00001d000184;Zm00001d004169;Zm00001d005752;Zm00001d017026;Zm00001d018192;Zm00001d021873;Zm00001d027611;Zm00001d027998;Zm00001d028237;Zm00001d028408;Zm00001d031522;Zm00001d036024;Zm00001d037052;Zm00001d041972
